# Supplementary material for: Genetic variants of IFIH1 and DHX58 affect the chronicity of hepatitis C in the Chinese Han population
Source: PeerJ. 2023 Jan 30;11:e14740. doi: 10.7717/peerj.14740 (PMC9893905; doi:10.7717/peerj.14740)
Supplement: Supplemental Information 1 [file peerj-11-14740-s001.xlsx]

## Sheet: Sheet2
population	num	sex	age1	age	alt1	alt	ast1	ast	groups	HBsAg	antiHCV	RNA	Genetype	Genetype2	rs4158	rs0046	rs4160
1	1	2	60	1	11	0	27	0	1	0	1	1	1b	1	0	0	2
1	3	2	60	1	4	0	7	0	1	0	1	1	1b	1	0	0	0
1	4	2	45	1	26	0	21	0	0	0	1	0	3b	0	0	0	2
1	5	1	55	1	10	0	18	0	0	0	1	0	3b	0	0	0
1	7	1	61	1	25	0	18	0	0	0	1	0	1b/2a	2	0	1
1	8	1	60	1	22	0	34	0	1	0	1	1	1b	1	1	1
1	9	2	52.4	1	6	0	8	0	0	0	1	0	1b	1	0	0	0
1	11	2	60	1	16	0	28	0	0	0	1	0	3b	0	1	0	1
1	13	1	46	1	5	0	10	0	1	0	1	1	1b/3b	2	0	0	2
1	14	1	50	1	4	0	3	0	0	0	1	0	1b/2a	2		0	0
1	15	1	47	1	9	0	15	0	1	0	1	1	1b	1	2	1	2
1	16	2	40	0	7	0	15	0	0	0	1	0	1b	1	0	0	0
1	19	1	62	1	10	0	6	0	0	0	1	0	1b	1	2	0
1	20	1	66	1	26	0	37	0	1	0	1	1	1b	1		0	0
1	25	1	75	1	4	0	9	0	1	0	1	1	1b	1	0	0	0
1	29	2	68	1	3	0	14	0	1	0	1	1	1b/2a	2	0	0	0
1	34	1	49	1	15	0	28	0	0	0	1	0	1b/2a	2	1	0	0
1	35	2	46	1	3	0	12	0	0	0	1	0	1b	1		0	2
1	36	1	50	1	10	0	13	0	0	0	1	0	1b	1	0	0	0
1	37	1	47	1	75	1	30	0	1	0	1	1	1b	1	0	1	0
1	39	1	75	1	92	1	87	1	1	0	1	1	3b	0	0	0	0
1	43	1	60	1	10	0	17	0	1	0	1	1	1b	1	0	0	0
1	44	1	52	1	17	0	22	0	0	0	1	0	3b	0	1	0	0
1	48	1	56	1	20	0	17	0	1	0	1	1	1b	1	1	0	0
1	50	1	79	1	30	0	14	0	1	0	1	1	1b/2a	2	0	0
1	53	1	35	0	32	0	31	0	1	0	1	1	1b	1	0	1	0
1	54	1	56	1	57	1	54	1	0	0	1	0	1b	1	2	0	2
1	56	1	40	0	2	0	14	0	1	0	1	1	1b	1	0	0	0
1	58	1	48	1	26	0	24	0	1	0	1	1	1b	1	2	0	0
1	60	2	62	1	7	0	17	0	0	0	1	0	3b	0	0	0	0
1	63	1	69	1	14	0	45	1	1	0	1	1	1b	1		1	0
1	65	2	66	1	8	0	19	0	0	1	1	0	1b	1
1	67	1	53	1	35	0	26	0	1	0	1	1	2a	0	2	0	0
1	68	1	44	1	46	1	35	0	0	0	1	0	1b	1	0	0	0
1	69	2	78	1	3	0	11	0	0	0	1	0	1b	1		0	0
1	74	1	28	0	14	0	11	0	1	1	1	1	1b	1	0	0	0
1	75	1	60	1	12	0	15	0	1	0	1	1	1b/2a	2	0	0	0
1	76	1	61	1	13	0	14	0	1	0	1	1	1b	1	0	1	0
1	77	1	52.4	1	7	0	10	0	0	0	1	0	1b/2a	2	0	0	0
1	80	1	60	1	4	0	12	0	0	0	1	0	3b	0		0	0
1	82	1	52	1	22	0	27	0	1	1	1	1	1b	1	2	0
1	85	1	49	1	28	0	25	0	1	0	1	1	1b/2a	2	2	1	0
1	86	2	62	1	22	0	31	0	0	0	1	0	2a	0		0	0
1	87	2	50	1	19	0	27	0	0	0	1	0	1b	1		0	2
1	89	2	52.4	1	9	0	16	0	0	0	1	0	1b	1	0	0	0
1	90	1	40	0	18	0	13	0	0	0	1	0	1b	1	0	1	0
1	91	2	70	1	4	0	12	0	0	0	1	0	3b	0	0	0	0
1	92	1	55	1	11	0	17	0	0	0	1	0	1b/2a	2	2	1
1	96	1	52	1	22	0	8	0	1	0	1	1	1b	1	0	0	0
1	99	2	39	0	7	0	16	0	0	0	1	0	1b	1		0	2
1	100	2	49	1	6	0	9	0	0	0	1	0	3b	0	0	0	0
1	102	1	50	1	14	0	12	0	0	0	1	0	1b/2a	2	1	0	0
1	104	1	51	1	8	0	14	0	1	0	1	1	1b	1	0	0	0
1	106	1	50	1	21	0	22	0	1	0	1	1	1b	1	0	0	0
1	107	1	55	1	12	0	11	0	1	0	1	1	1b	1	0	0	0
1	110	2	50	1	11	0	15	0	1	1	1	1	2a	0	0	0	1
1	115	2	60	1	38	0	72	1	1	0	1	1	1b	1	0	0	0
1	116	2	52.4	1	6	0	13	0	0	0	1	0	1b	1	0	0	0
1	118	2	47	1	11	0	18	0	1	0	1	1	1b/2a	2	0	0	2
1	122	1	52	1	158	1	86	1	0	0	1	0	1b	1	1	0	0
1	135	1	45	1	64	1	34	0	1	0	1	1	1b	1	0	0	1
1	137	1	38	0	7	0	3	0	1	0	1	1	1b	1	0	0	0
1	142	1	53	1	29	0	30	0	1	0	1	1	1b	1	0	0	0
1	154	1	60	1	56	1	42	1	1	0	1	1	1b	1	0	0	0
1	158	1	80	1	17	0	31	0	0	0	1	0	1b	1	0	0	0
1	165	2	49	1	17	0	19	0	0	0	1	0	1b/2a	2		1
1	166	2	46	1	15	0	19	0	1	1	1	1	1b	1	1	0	2
1	172	1	52.4	1	9	0	15	0	1	0	1	1	1b	1	0	0	0
1	228	2	52.4	1	13	0	25	0	1	0	1	1	1b	1	0	0	0
1	229	1	63	1	6	0	11	0	0	0	1	0	3b	0	0	0	0
1	309	1	73	1	44	1	101	1	1	0	1	1	1b/2a	2	0	0	0
1	406	1	42	1	30	0	44	1	0	1	1	0	1b	1	0	1	0
1	407	1	50	1	24	0	40	1	0	0	1	0	1b	1	1	0	0
1	409	1	60	1	50	1	37	0	1	0	1	1	1b	1	0	1	0
1	415	2	67	1	15	0	23	0	0	0	1	0	1b/2a	2	0	0	1
1	421	1	40	0	6	0	17	0	0	1	1	0	3b	0	1	0	2
1	428	1	40	0	50	1	31	0	0	0	1	0	1b	1	0	0	0
1	429	2	45	1	4	0	6	0	0	0	1	0	1b	1	0	1	0
1	431	2	63	1	65	1	83	1	0	1	1	0	1b	1	0	0	0
1	432	1	50	1	11	0	19	0	0	0	1	0	1b/2a	2	0	0	0
1	436	2	70	1	11	0	18	0	1	0	1	1	1b	1	0	0	0
1	443	1	56	1	9	0	13	0	1	0	1	1	1b	1	0	0	0
1	449	1	58	1	42	1	35	0	1	0	1	1	1b	1	0	0	0
1	451	1	43	1	10	0	14	0	1	0	1	1	1b	1	0	0	0
1	452	1	64	1	16	0	27	0	1	0	1	1	1b	1	0	0	0
1	454	1	70	1	11	0	18	0	1	0	1	1	2a	0	0	0	0
1	456	2	72	1	19	0	33	0	0	0	1	0	3b	0	0	1	0
1	458	1	53	1	23	0	20	0	1	0	1	1	3b	0	0	0	0
1	459	1	72	1	24	0	36	0	0	1	1	0	2a	0	0	0	2
1	463	1	57	1	20	0	22	0	0	0	1	0	1b	1	0	0	0
1	465	2	50	1	19	0	21	0	1	1	1	1		0	1	1	2
1	466	1	55	1	9	0	6	0	0	0	1	0	1b	1	1	1
1	467	1	50	1	32	0	24	0	0	0	1	0	1b/2a	2	0	1	0
1	468	1	41	1	174	1	104	1	0	0	1	0	3b	0	0	0	0
1	469	1	60	1	30	0	23	0	1	1	1	1	1b/2a	2	0	1	0
1	470	2	61	1	71	1	39	0	1	0	1	1	1b/2a	2	0	0	0
1	471	1	62	1	16	0	12	0	0	0	1	0	1b/2a	1	0	1	0
1	484	1	56	1	26	0	19	0	0	1	1	0	1b	1	0	0	1
1	490	2	48	1	5	0	6	0	1	0	1	1	1b	1	0	0	1
1	492	1	64	1	17	0	20	0	0	0	1	0	1b	1	0	0	1
1	494	2	66	1	11	0	22	0	0	0	1	0	1b/2a	1	0	0	0
1	495	1	59	1	20	0	22	0	0	0	1	0	1b/2a	1	0		0
1	499	1	46	1	11	0	14	0	1	0	1	1	1b	1	0	1	0
1	502	1	28	0	41	1	35	0	0	0	1	0	1b	1	0	1	0
1	503	2	40	0	19	0	21	0	1	0	1	1	1b/2a	2	1
1	506	2	67	1	11	0	14	0	0	0	1	0	1b	1	0	1	0
1	507	1	51	1	17	0	14	0	0	0	1	0	1b/2a	1	0	0	0
1	508	2	46	1	11	0	10	0	0	0	1	0	3b	0	1	0	1
1	509	1	34	0	29	0	32	0	0	0	1	0	2a	1	1	0	2
1	510	2	54	1	22	0	34	0	0	0	1	0	1b	1	1	0	1
1	511	1	31	0	14	0	22	0	0	0	1	0	1b	1	1	0	1
1	512	1	47	1	55	1	45	1	0	0	1	0	3b	1	2	1	0
1	525	1	50	1	4	0	1	0	0	0	1	0	1b	1		0	0
1	536	1	52.4	1	4	0	13	0	0	0	1	0	3b	1	0	1	0
1	618	1	53	1	12	0	19	0	1	0	1	1	2a	0	0	0	0
1	620	1	46	1	17	0	17	0	1	0	1	1	1b	1	0	1	0
1	632	1	31	0	30	0	24	0	0	0	1	0	1b	1	0	0	0
1	634	1	52.4	1	8	0	19	0	0	0	1	0	1b	1	0	0	1
1	639	2	51	1	6	0	15	0	0	0	1	0	3b	0	0	0	0
1	645	1	27	0	46	1	21	0	1	0	1	1	2a/3b	2	0	1	0
1	647	1	64	1	17	0	12	0	0	1	1	0	3b	0	0	0	0
1	651	2	56	1	0	0	24	0	0	0	1	0	1b/2a	1	0	0
1	653	2	50	1	46	1	46	1	1	0	1	1	1b	1	1	1
1	661	2	59	1	5	0	6	0	0	0	1	0	1b	1	1	1	1
1	664	1	53	1	34	0	33	0	0	0	1	0	3b	0	0	0	0
1	669	1	79	1	7	0	10	0	1	0	1	1	1b	1	0	1
1	671	2	61	1	6	0	10	0	1	0	1	1	1b	1	0	0	0
1	674	1	45	1	10	0	9	0	0	0	1	0	1b	1	0	1	0
1	690	1	63	1	8	0	27	0	0	0	1	0	1b	1	0	0
1	695	2	48	1	9	0	14	0	0	0	1	0	3b	0	0	1	0
1	696	1	50	1	8	0	4	0	0	0	1	0	1b/2a	1	0	1
1	702	1	54	1	10	0	10	0	1	0	1	1	1b	1	1	1	1
1	705	2	33	0	7	0	6	0	0	0	1	0	1b	1	0	0	0
1	709	1	59	1	10	0	15	0	1	1	1	1	1b/2a	2	0	0	0
1	711	2	52	1	12	0	16	0	0	0	1	0	1b/2a	2	1	1	1
1	713	1	32	0	7	0	10	0	1	0	1	1	3b	0	0	0	0
1	753	1	32	0	69	1	133	1	1	0	1	1	1b/2a	2	0	0	0
1	768	2	60	1	11	0	17	0	0	0	1	0	3b	0	0	0	0
1	771	2	41	1	11	0	14	0	0	1	1	0	2a	0	2	0	1
1	788	1	46	1	20	0	24	0	1	0	1	1	1b	1	0	0	0
1	789	1	65	1	5	0	4	0	1	0	1	1	1b	1	1	0	1
1	794	2	46	1	18	0	25	0	0	0	1	0	1b	1	0	0	0
1	808	1	35	0	12	0	9	0	1	0	1	1	1b/2a	2	0	0	0
1	818	2	63	1	8	0	16	0	0	0	1	0	1b	1	0	0	0
1	822	1	54	1	39	0	61	1	1	0	1	1	1b/2a	2	0	0	0
1	851	1	58	1	58	1	38	0	1	0	1	1	1b/2a	2	0	0	0
1	861	1	47	1	34	0	33	0	0	0	1	0	1b/2a	2	0	0	0
1	862	1	74	1	25	0	28	0	0	0	1	0	3b	0	0	1	0
1	864	1	44	1	17	0	17	0	1	0	1	1	1b	1	0	0
1	878	2	39	0	17	0	18	0	0	0	1	0	1b	1	0	0	0
1	883	1	61	1	17	0	11	0	1	0	1	1	1b	1	1	0	1
1	902	1	47	1	21	0	30	0	1	0	1	1	1b	1	0	0	0
1	924	1	32	0	20	0	25	0	0	0	1	0	1b	1	2	0	1
1	925	2	65	1	31	0	58	1	1	0	1	1	1b	1	0	1	0
1	939	1	32	0	8	0	8	0	0	0	1	0	1b	1	0	1	0
1	944	1	42	1	11	0	11	0	0	0	1	0	3b	0	0	0	0
1	946	2	36	0	45	1	36	0	1	0	1	1	1b	1	0	0	0
1	958	2	36	0	8	0	11	0	1	1	1	1	1b	1	1	0	1
1	962	1	46	1	13	0	13	0	1	0	1	1	1b/2a	2	1	0	1
1	964	2	46	1	6	0	11	0	0	0	1	0	1b	1	0	0	0
1	966	1	65	1	4	0	2	0	0	0	1	0	3b	0	0	0	0
1	967	1	57	1	17	0	11	0	1	0	1	1	3b	0	0	0	0
1	970	1	40	0	28	0	27	0	0	0	1	0	1b/2a	2	0	1	0
1	981	2	40	0	14	0	16	0	0	0	1	0	1b	1	0	0	0
1	983	1	49	1	9	0	8	0	0	0	1	0	3b	0	0	1	0
1	986	1	62	1	19	0	13	0	0	0	1	0	2a	0	0	1	0
1	989	1	40	0	14	0	16	0	0	1	1	0	1b	1	0	2
1	1032	2	43	1	32	0	42.23	1	1		1	1	2a	0	1	0	1
1	1033	2	50	1	58	1	42.23	1	1		1	1	1b/2a	2	0	0	0
1	1035	2	46	1	21	0	42.23	1	1		1	1	3b	0	0	1	0
1	1036	1	48	1	18	0	42.23	1	0		1	0	1b	1	1	1	1
1	1041	1	53	1	36	0	42.23	1	1		1	1	1b/2a	2	0	0	0
1	1044	2	42	1	46	1	42.23	1	0		1	0	3b	0	1	0
1	1047	1	39	0	27	0	42.23	1	0		1	0	3b	0	0	0	1
1	1049	1	32	0	16	0	42.23	1	0		1	0	1b/2a	2	0	0	0
1	1051	2	31	0	42	1	42.23	1	1		1	1	1b	1	0	0	0
1	1053	1	52	1	9	0	42.23	1	0		1	0	1b	1	0	0	0
1	1054	1	46	1	17	0	42.23	1	1		1	1	1b	1	1	0	1
1	1056	1	49	1	29	0	42.23	1	0		1	0	3b	0	0	0	0
1	1059	2	41	1	37	0	42.23	1	0		1	0	1b/2a	2	0	0	0
1	1060	1	40	0	49	1	42.23	1	1		1	1	1b/2a	2	0	0	0
1	1062	2	39	0	24	0	42.23	1	1		1	1	1b/2a	2	0	0	0
1	1065	2	40	0	35	0	42.23	1	1		1	1	3b	0	0	0	0
1	1067	2	45	1	17	0	42.23	1	0		1	0	1b/2a	2	0	1	0
2	1	2	31.9179	0	31	0	29	0	0		1	0		2	0	0	0
2	3	1	25.9165	0	168	1	108	1	1	0	1	1	1b/2a	2	0	0	0
2	4	2	30.5024	0	34	0	32	0	1	0	1	1	1b/2a	2	0	1	0
2	6	2	28.167	0	69	1	60	1	1	0	1	1	1b	1	0	0	0
2	7	1	49.2512	1	21	0	23	0	1	0	1	1	1b	1	0	0	0
2	9	1	26.7488	0	55	1	27	0	1	0	1	1	1b	1	1	0	0
2	11	1	30.3354	0	90	1	41	1	1	0	1	1	1b	1	0	0	0
2	12	1	30.7488	0	22	0	24	0	1	0	1	1	1b	1	1	0	1
2	13	1	24.0575	0	44	1	12	0	1	0	1	1	1b	1	0	2	0
2	18	1	37.5852	0	80	1	44	1	1	0	1	1	1b/3b	2	0	0	0
2	20	1	34.9185	0	31	0	29	0	1	0	1	1	1b/2a	2	2	0	2
2	21	1	49.9165	1	20	0	23	0	1	0	1	1	1b	1	1	0	1
2	25	1	29.7467	0	34	0	32	0	1	0	1	1	1b/2a	2	0	0	0
2	27	1	45.7467	1	37	0	34	0	1	1	1	1	1b	1	0	0	0
2	28	2	24.167	0	70	1	60	1	1	0	1	1	1b/2a	2	1	2	1
2	29	2	30.1656	0	7	0	13	0	0	0	1	0		0	1	0	1
2	31	2	19.9179	0	34	0	32	0	1	0	1	1	1b	1	0	0	0
2	32	2	25.0842	0	190	1	168	1	1	0	1	1	1b	1	1	0	0
2	34	1	37.8316	0	168	1	111	1	1	0	1	1	1b	1	1	0	1
2	36	1	42.5845	1	25	0	27	0	1	0	1	1	1b	1	0	0	0
2	37	1	35.0856	0	297	1	214	1	1	0	1	1	1b/2a	2	0	0	0
2	39	1	38.9185	0	8	0	14	0	1	0	1	1	1b	1	0	1	0
2	41	1	35.6715	0	82	1	45	1	1	0	1	1	1b	1	0	0	0
2	42	1	30.4175	0	34	0	32	0	1	0	1	1	1b	1		0	1
2	44	2	36.9993	0	52	1	46	1	1	0	1	1	1b	1	1	0	1
2	46	2	40.3368	1	20	0	36	0	1	0	1	1	2a	0		0
2	47	1	34.6694	0	22	0	24	0	1	0	1	1	1b	1	0	0	0
2	49	2	35.3374	0	21	0	23	0	0		1	0		1	0	0	0
2	50	1	33.0705	0	22	0	24	0	1	0	1	1	1b/2a	2	0	0	0
2	51	2	31.1677	0	22	0	24	0	1	0	1	1	1b	1	0	0	0
2	53	1	37.6701	0	71	1	57	1	1	0	1	1	1b	1	0	0
2	54	1	31.3676	0	20	0	23	0	1	0	1	1	1b	1	0	2
2	57	1	33.0842	0	8	0	14	0	1	0	1	1	1b	1	1	0	1
2	59	1	32.5859	0	94	1	24	0	1	0	1	1	1b	1	0	0	0
2	61	2	28.3368	0	21	0	24	0	1	0	1	1	1b/3b	2	1	0	1
2	65	2	25.0842	0	155	1	138	1	1	0	1	1	1b	1	1	1	0
2	67	2	34.7488	0	67	1	57	1	1	0	1	1	1b	1	1	0	0
2	69	1	44.1205	1	160	1	85	1	1	0	1	1	1b	1	0	0	0
2	70	1	29.5852	0	8	0	14	0	1	0	1	1	1b	1	0	0	0
2	72	1	26.3354	0	88	1	23	0	1	0	1	1	1b	1	0	0	0
2	74	1	40.2519	1	105	1	71	1	1	0	1	1	1b/3b	2	0	0	0
2	75	1	30.2505	0	9	0	14	0	1	0	1	1	1b	1	0	0	0
2	76	1	31.4497	0	128	1	78	1	1	1	1	1	1b	1	1	0	2
2	77	1	35.5044	0	25	0	27	0	1	0	1	1	2a	0	0	0	0
2	78	1	22.7488	0	67	1	23	0	1	0	1	1	1b	1	0	1	0
2	80	1	31.0007	0	20	0	36	0	1	0	1	1	1b	1	0	0	0
2	82	1	26.4175	0	60	1	15	0	1		1	1	1b	1	0	0	0
2	83	1	40.1643	1	9	0	15	0	1		1	1	1b	1	0	2	0
2	84	1	23.833	0	504	1	316	1	1	0	1	1	1b	1	0	0	0
2	87	1	24.7474	0	35	0	32	0	0	0	1	0		1		0	0
2	88	2	40.6708	1	9	0	15	0	0	0	1	0		1	0	0	1
2	89	2	39.7481	0	37	0	24	0	1	0	1	1	1b	1	0	2	2
2	90	2	22.0835	0	31	0	29	0	0	0	1	0		1	0	0	0
2	91	2	42.4175	1	9	0	15	0	1	0	1	1	1b/2a	2	0	0	0
2	92	2	22.0835	0	31	0	29	0	0	0	1	0		1	0	0	0
2	93	2	27.833	0	31	0	29	0	1	0	1	1	2a	0	0	0	0
2	94	1	36.3368	0	37	0	34	0	1	0	1	1	1b	1		0	0
2	95	1	42.6694	1	90	1	58	1	1	0	1	1	2a/3b	2	0	1	0
2	96	1	34.9185	0	25	0	27	0	1	0	1	1	1b	1	0	1	0
2	97	1	37.4182	0	31	0	30	0	1	0	1	1	1b	1	0	0	0
2	98	1	36.4079	0	35	0	32	0	1	0	1	1			1	0	1
2	101	1	36.4189	0	20	0	23	0	1	0	1	1	1b	1		0	0
2	103	1	31.7481	0	21	0	23	0	1	0	1	1	1b	1	0	0	0
2	104	1	24.3258	0	9	0	15	0	1	1	1	1	1b	1	0	0	2
2	106	1	33.4182	0	100	1	66	1	1	0	1	1	3b	0	0	0	0
2	107	2	37.5031	0	21	0	24	0	0	0	1	0		1	0	0	0
2	110	2	33.4182	0	9	0	15	0	1	0	1	1	1b	1	0	0	0
2	111	2	28.7474	0	9	0	15	0	1	0	1	1	1b	1	0	1	0
2	112	2	23.3374	0	36	0	24	0	1	0	1	1	1b	1	0	1	0
2	113	2	29.2512	0	35	0	32	0	0	0	1	0		1	0	1	0
2	114	1	32.3368	0	9	0	15	0	1	0	1	1	1b	1	0	1	0
2	115	1	30.2505	0	9	0	15	0	0	0	1	0		1	1	0	0
2	117	1	28.9993	0	9	0	15	0	0	0	1	0		0	1	2	2
2	118	1	41.1663	1	35	0	32	0	1	0	1	1	1b/2a	2	0	1
2	120	1	32.9172	0	35	0	32	0	0	0	1	0		0	0	0	0
2	121	1	29.9165	0	108	1	75	1	1	0	1	1	3b	0	1	0	0
2	129	1	25.0842	0	35	0	32	0	0	0	1	0		2	0	0	0
2	131	1	39.2526	0	39	0	35	0	0	0	1	0		1	0	0	0
2	132	1	34.4175	0	119	1	15	0	0	0	1	0		0	0	0	0
2	134	2	39.2526	0	31	0	30	0	0	0	1	0		1	0	0	1
2	135	2	36.9172	0	26	0	27	0	1	0	1	1	1b/2a	2	2	0	2
2	136	2	21.9986	0	22	0	24	0	0	0	1	0		1	0	0	0
2	139	2	26.3354	0	26	0	27	0	0	0	1	0		1	1	0	0
2	140	2	25.3963	0	22	0	24	0	0	0	1	0		0	0	0	0
2	141	2	26.6694	0	10	0	15	0	0	0	1	0		1	1	0	0
2	142	2	39.2608	0	31	0	30	0	0	0	1	0		1	1	0	0
2	143	2	29.9959	0	32	0	30	0	0	0	1	0		1	1	1	2
2	144	1	40.3751	1	83	1	56	1	1	0	1	1	1b	1	0	0	0
2	145	1	34.9185	0	22	0	25	0	1	0	1	1	1b	1	0	1	0
2	146	1	40.2519	1	32	0	30	0	1	0	1	1	1b/2a	2	0	0	0
2	147	1	22.4175	0	26	0	27	0	0	0	1	0		0	0	0	0
2	148	1	39.2526	0	32	0	30	0	0	0	1	0		0	0	2
2	151	1	39.5866	0	114	1	51	1	1	0	1	1	1b/2a	2		0	0
2	152	1	28.0849	0	90	1	53	1	1	0	1	1	1b/2a	2		0	0
2	153	1	32.1287	0	10	0	16	0	1	0	1	1	1b	1	1	0	1
2	154	1	43.5866	1	10	0	16	0	1	1	1	1	1b	1	0	0	0
2	157	1	24.6708	0	37	0	34	0	1	0	1	1	2a/3b	2	1	0	1
2	158	1	30.2505	0	36	0	32	0	1	0	1	1	1b	1	0	0
2	159	1	35.4196	0	77	1	30	0	0	0	1	0		1	0	0	0
2	162	1	32.2519	0	26	0	27	0	0	0	1	0		0	0	2	0
2	163	1	26.3354	0	20	0	36	0	1	0	1	1			0	0	0
2	166	1	25.5852	0	10	0	16	0	1	0	1	1	1b	1	0	0	0
2	169	1	27.4196	0	32	0	30	0	1	0	1	1	1b	1	1	1	1
2	173	1	41.1663	1	10	0	16	0	1	0	1	1	1b	1	0	0	0
2	174	1	38.1656	0	83	1	113	1	1	0	1	1	1b	1	0	0	0
2	179	1	42.9185	1	26	0	27	0	0	0	1	0		1	0	1	0
2	180	1	29.2512	0	10	0	16	0	0	0	1	0		0	2	0	0
2	181	1	34.9185	0	57	1	57	1	0	0	1	0		1	0	1	0
2	183	1	29.3361	0	99	1	61	1	0	0	1	0		1		0	0
2	186	1	40.2519	1	32	0	30	0	1	0	1	1	1b	1	1	0	1
2	187	1	21.1663	0	11	0	16	0	0	0	1	0		1	0	0	0
2	189	1	31.4196	0	11	0	16	0	1	0	1	1	1b	1	2	0	2
2	190	1	30.0835	0	11	0	16	0	0	0	1	0		1	0	1
2	193	1	23.2526	0	59	1	79	1	1	0	1	1	2a	0	0	0	0
2	194	1	37.7467	0	39	0	35	0	1	1	1	1	1b	1	1	0	1
2	195	1	28.6188	0	11	0	16	0	1	0	1	1	1b/2a	2	0	0	0
2	196	1	42.8337	1	115	1	16	0	1	0	1	1	1b	1	0	0	0
2	199	1	28.9172	0	115	1	16	0	1	0	1	1	1b	1	0	0	0
2	204	1	40.6598	1	11	0	16	0	1	1	1	1	2a	0	0	0	0
2	206	2	32.4189	0	262	1	381	1	0	1	1	0		1	0	1	0
2	207	2	30.0835	0	90	1	85	1	1	0	1	1	3b	0	0	0	1
2	208	2	39.4196	0	11	0	16	0	0	0	1	0		1	0	0	0
2	209	2	34.4175	0	36	0	33	0	1	0	1	1	1b	1	0	0	0
2	212	2	24.167	0	11	0	16	0	0	0	1	0		2	0	0	0
2	216	1	32.4189	0	102	1	30	0	0		1	0		2	0	0	0
2	218	1	45.5852	1	257	1	165	1	1	0	1	1	1b	1		0	1
2	219	1	42.5845	1	65	1	61	1	0	0	1	0		1	0	0	0
2	223	1	32.2519	0	37	0	34	0	0	0	1	0		2	0	0	0
2	224	1	29.4182	0	138	1	80	1	0	0	1	0		1	0	0	0
2	226	1	24.5859	0	33	0	30	0	0	0	1	0		1	1	0	1
2	228	2	19.1677	0	50	1	64	1	0	0	1	0		2	0	0	0
2	229	2	44.7474	1	37	0	24	0	0	0	1	0		1	0	0	1
2	231	2	28.8323	0	37	0	24	0	0	0	1	0		0	0	0	0
2	234	2	27.2526	0	27	0	27	0	0	0	1	0		2	0	0	0
2	236	2	28.9993	0	33	0	30	0	0	0	1	0		2	0	0	0
2	237	2	37.5222	0	55	1	17	0	0	0	1	0		1	0	0	0
2	238	2	24.6708	0	11	0	17	0	0	0	1	0		1	0	1	0
2	239	2	28.4189	0	37	0	24	0	1	0	1	1	1b	1		1
2	241	2	20.5859	0	79	1	50	1	0	0	1	0		0	0	1	0
2	243	1	29.9165	0	11	0	17	0	1	0	1	1	1b/2a	2	1	0	1
2	244	1	33.4182	0	36	0	24	0	0	0	1	0		0	1	0	1
2	245	1	28.7474	0	63	1	17	0	0	0	1	0		1	0	0	0
2	246	1	32.4189	0	70	1	28	0	0	0	1	0		1	1	0	0
2	248	1	38.0835	0	23	0	25	0	0	0	1	0		1	0	0	0
2	250	1	42.5133	1	27	0	28	0	0	0	1	0		0		0	0
2	251	1	37.9165	0	72	1	25	0	1	0	1	1	1b	1	1	0	1
2	255	1	34.4175	0	23	0	25	0	1	0	1	1	1b/3b	2	0	0	0
2	258	1	37.3388	0	27	0	28	0	1	0	1	1	1b	1	0	0	0
2	260	1	29.8316	0	27	0	28	0	0	0	1	0		1	0	0	0
2	263	1	35.5044	0	37	0	24	0	0	0	1	0		1	1	0	1
2	264	1	26.5845	0	38	0	34	0	0	0	1	0		1	0	0	0
2	265	1	24.9993	0	37	0	24	0	0	0	1	0		0	1	0	1
2	268	1	32.0849	0	39	0	35	0	0	0	1	0		2	0	0	0
2	269	2	38.2505	0	37	0	24	0	0	0	1	0		1	0	0	0
2	270	2	28.7474	0	104	1	17	0	0	0	1	0		1	0	1	0
2	271	2	26.0835	0	29	0	24	0	0	0	1	0		2	2	0	2
2	273	1	25.4182	0	12	0	17	0	0	0	1	0		1	1	0	0
2	276	1	38.7488	0	582	1	118	1	0	0	1	0		1	0	1
2	277	1	37.1663	0	33	0	30	0	1	0	1	1	1b	1	0	1
2	278	1	41.0842	1	109	1	30	0	1	0	1	1	2a	0	1	1	1
2	280	1	37.9165	0	12	0	17	0	0	0	1	0		0		0
2	281	1	44.5859	1	12	0	17	0	1	0	1	1	1b	1	0	1	0
2	282	1	26.2505	0	159	1	51	1	1	1	1	1	1b	1	0	0	0
2	287	1	30.9185	0	211	1	54	1	0	0	1	0		2	0	0	0
2	289	1	38.0835	0	27	0	28	0	0	0	1	0		1	0	0	0
2	291	2	29.9986	0	20	0	23	0	0	1	1	0		0	0	1
2	292	1	32.4189	0	27	0	28	0	0	0	1	0		0	2	1
2	293	1	29.3361	0	12	0	17	0	0	0	1	0		2	0	1	0
2	295	1	38.7488	0	12	0	18	0	0	0	1	0		1	0	0	0
2	296	1	33.1663	0	196	1	100	1	0	1	1	0		1	0	0	0
2	297	1	28.2902	0	20	0	35	0	0	0	1	0		2	1	0	1
2	298	1	25.1253	0	70	1	60	1	0	0	1	0		0	0	0	0
2	299	1	33.4155	0	12	0	18	0	0	0	1	0		2	0	1	0
2	300	1	32.6708	0	23	0	25	0	0	0	1	0		0	0	0	0
2	301	1	28.2519	0	70	1	62	1	0	0	1	0		1	0	0	0
2	302	1	36.4189	0	29	0	24	0	0	0	1	0		0	0	0	0
2	304	1	35.1677	0	110	1	71	1	0	0	1	0		1	0	0	0
2	305	1	28.2519	0	12	0	18	0	0	0	1	0		0	1	1	0
2	306	1	29.9165	0	20	0	23	0	0	0	1	0		1	1	0	1
2	307	1	29.4182	0	30	0	36	0	0	0	1	0		1	0	0	0
2	312	2	29.0842	0	200	1	71	1	1	0	1	1	1b/2a	2	0	0	0
2	314	2	35.5154	0	20	0	23	0	0	0	1	0		1	0	1	0
2	316	2	32.4	0	13	0	18	0	0	0	1	0		1	1	1	1
2	320	1	29.306	0	85	1	52	1	0	0	1	0		1	0	0	0
2	321	1	39.1677	0	38	0	34	0	0	0	1	0		0	0	1	0
2	322	2	26.5845	0	68	1	78	1	1	0	1	1	1b	1	1	1	0
2	326	1	43.9945	1	33	0	31	0	0	0	1	0		1	0	0	0
2	327	2	31.5866	0	30	0	24	0	0	0	1	0		1	0	0	0
2	328	2	30.1656	0	28	0	28	0	0	0	1	0		1	2	0	0
2	329	2	25.2512	0	20	0	23	0	0	0	1	0		0	2	0	2
2	330	2	24.7474	0	13	0	18	0	0	0	1	0		0	0	0	0
2	331	2	28.7474	0	79	1	23	0	0	0	1	0		1	1	1	1
2	333	1	37.2512	0	13	0	18	0	0	1	1	0		1	1	0	1
2	335	1	30.0835	0	127	1	148	1	0	0	1	0		0	0	0	0
2	338	1	32.9172	0	67	1	25	0	1	0	1	1	2a	0	0	0	0
2	339	1	37.6975	0	13	0	18	0	1	1	1	1	1b	1	0	1	0
2	341	1	40.7173	1	30	0	63	1	1	0	1	1	1b	1	1	0	0
2	342	2	34.7789	0	71	1	99	1	1	0	1	1	1b	1	0	0	1
2	345	2	24	0	13	0	18	0	1	0	1	1	1b	1	1	0	1
2	346	1	34.0835	0	23	0	25	0	1	0	1	1	1b	1	0	0	0
2	350	1	43.4196	1	125	1	18	0	0	0	1	0		1	0	1	0
2	351	1	42.9185	1	20	0	35	0	1	0	1	1	1b/2a	2	0	0	0
2	352	1	24.8323	0	311	1	301	1	0	0	1	0		0	0	0	0
2	354	1	26.9624	0	13	0	18	0	0	0	1	0		1	1	0	0
2	356	1	33.9	0	20	0	36	0	1	0	1	1	1b	1	1	1	0
2	358	2	36.0849	0	33	0	31	0	1	0	1	1	1b	1	1	1
2	359	2	34.1656	0	77	1	44	1	1	0	1	1	1b	1	0	0	0
2	360	2	30.2505	0	13	0	18	0	1	0	1	1	1b	1	0	0	0
2	364	2	31.6715	0	34	0	31	0	1	0	1	1	1b	1	0	0	0
2	369	1	36	0	28	0	28	0	0	0	1	0		0	0	0	0
2	370	1	31.2526	0	88	1	79	1	1	0	1	1	1b	1	0	0	0
2	371	1	28.9172	0	38	0	34	0	1	0	1	1	1b/2a	2	0	1	0
2	374	1	44.0958	1	99	1	63	1	1	0	1	1	1b/2a	2	0	0	0
2	379	1	23.3374	0	83	1	60	1	0	1	1	0		1	1	1	1
2	383	2	31.0856	0	100	1	50	1	1	0	1	1	2a	0	1	0	1
2	386	2	31.833	0	24	0	25	0	1	0	1	1	1b	1	0	2	2
2	389	1	23.7481	0	190	1	159	1	1	0	1	1	2a	0	0	2
2	390	1	48.8323	1	223	1	180	1	1	0	1	1	3b	0	1	2	0
2	391	1	44.3422	1	14	0	19	0	1	0	1	1	2a	0	0	0	0
2	392	1	29.0842	0	24	0	25	0	0	0	1	0		1	0		0
2	397	1	41.3169	1	80	1	33	0	1	0	1	1	3b	0	2		2
2	398	1	37.4182	0	90	1	65	1	1	0	1	1	1b	1	0	0	2
2	403	1	32.3368	0	34	0	31	0	1	0	1	1	2a	0	1		1
2	404	1	26.2505	0	110	1	58	1	1	0	1	1	1b/2a	2	1	0	1
2	406	2	29.5852	0	15	0	19	0	0	1	1	0		1	0	0	0
2	407	2	33.4182	0	15	0	19	0	1	0	1	1	1b/2a	2	0	0	0
2	408	2	37.8371	0	15	0	19	0	1	0	1	1	2a	0	0	0	0
2	410	2	31.2526	0	21	0	23	0	1	0	1	1	1b	1	0	1	0
2	416	2	40.2519	1	122	1	123	1	1	0	1	1	1b	1	0	0	0
2	417	2	27.3374	0	34	0	31	0	1	0	1	1	1b	1	0	0	0
2	418	1	43.1677	1	15	0	19	0	0	0	1	0		0	0	0	0
2	422	1	40.2519	1	15	0	19	0	1	0	1	1	1b	1	0	0	0
2	424	1	29.4292	0	92	1	52	1	1	0	1	1	1b	1	0	0	0
2	427	1	34.8556	0	36	0	33	0	1	0	1	1	2a	0	0	1	0
2	429	1	44.0849	1	38	0	35	0	1	0	1	1	1b	1	2		2
2	431	1	35.0856	0	20	0	35	0	0	0	1	0		0	0	1	0
2	433	1	39.0007	0	24	0	26	0	1	0	1	1	1b	1	0	0	0
2	434	1	39.4196	0	34	0	31	0	1	0	1	1	1b	1	0	0	0
2	435	1	26.7488	0	144	1	70	1	0	0	1	0		0	1	0	0
2	436	2	43.2526	1	15	0	20	0	1	0	1	1	3b	0	0	1	1
2	439	2	32.7721	0	15	0	20	0	0	0	1	0		1	0	1	0
2	440	2	34.0862	0	28	0	28	0	1	0	1	1	3b	0	0	0	0
2	441	2	30.7488	0	36	0	33	0	0	0	1	0		1	0	0	0
2	442	2	32.4189	0	21	0	24	0	1	0	1	1	1b/2a	2	1	0	0
2	446	1	33.4182	0	73	1	31	0	1	0	1	1	1b	1	0	0	0
2	448	1	32.5859	0	28	0	28	0	1	0	1	1	2a/3b	2	0	0	0
2	449	1	37.9165	0	75	1	20	0	1	0	1	1	1b	1	0	0	0
2	452	1	31.833	0	114	1	58	1	0	0	1	0		0	0	1	0
2	454	1	33.7467	0	88	1	31	0	0	0	1	0		1	0	0	0
2	460	1	28.9993	0	16	0	20	0	1	0	1	1	1b	1	0	0	0
2	467	2	38.141	0	16	0	20	0	1	0	1	1	1b	1	1	0	1
2	468	2	35.0746	0	28	0	28	0	0	0	1	0		1	1	0	1
2	470	1	32.6708	0	168	1	123	1	0	0	1	0		1	0	0	0
2	474	1	31.5948	0	16	0	20	0	0	0	1	0		0	1	0	1
2	477	1	41.2512	1	29	0	28	0	0	0	1	0		1	0	0	0
2	478	1	38.8337	0	20	0	35	0	0	0	1	0		1	0	0	0
2	479	1	28.5859	0	97	1	31	0	0	0	1	0		0	0	1	0
2	482	2	29.3306	0	16	0	20	0	0	0	1	0		0	0	1	0
2	483	1	27.4196	0	20	0	35	0	0	0	1	0		1	0	0	1
2	484	1	32.9993	0	16	0	20	0	0	0	1	0		1	0	0	0
2	485	1	25.9165	0	16	0	20	0	0	0	1	0		0	0	1	0
2	486	1	41.4182	1	120	1	86	1	0	0	1	0		1	0	0	0
2	487	1	29.2512	0	16	0	20	0	0	0	1	0		1	0	1	0
2	489	1	39.5866	0	34	0	32	0	0	0	1	0		1	0	0	0
2	492	1	25.0842	0	83	1	35	0	0	0	1	0		1	0	0	0
2	493	1	37.3361	0	21	0	23	0	0	0	1	0		1	0	0	0
2	494	1	36.5859	0	16	0	20	0	0	0	1	0		0	0	0	0
2	495	1	24.6708	0	24	0	26	0	0	0	1	0		1	1	0	0
2	496	1	39.7481	0	24	0	26	0	0	0	1	0		0	0	0	0
2	498	1	41.7358	1	21	0	24	0	0	0	1	0		0	0	0	0
2	499	1	30.3354	0	16	0	20	0	0	0	1	0		1	0	1	0
2	502	1	31.6715	0	16	0	21	0	0	0	1	0		0	0	0	1
2	504	1	29.2512	0	17	0	21	0	0	0	1	0		2	1	0
2	506	1	44.2902	1	125	1	57	1	0	0	1	0		1	0	0	0
2	509	1	41.1663	1	17	0	21	0	0	0	1	0		1	0	2
2	511	1	30.8337	0	38	0	35	0	0	0	1	0		1	0	0	0
2	512	1	42.4175	1	29	0	29	0	0	0	1	0		1	2	0	2
2	516	2	31.9179	0	37	0	33	0	0	0	1	0		0	0	0	0
2	518	2	29.1663	0	17	0	21	0	0	0	1	0		1	0	0	0
2	521	2	27.0856	0	29	0	29	0	0	0	1	0		1	0	1	0
2	522	2	39.0856	0	17	0	21	0	0	0	1	0		1	0	0	0
2	523	2	24.7912	0	17	0	21	0	0	0	1	0		0	0	1	0
2	524	2	32.4	0	29	0	29	0	0	0	1	0		0	0	0	0
2	525	2	37.4182	0	93	1	35	0	0	0	1	0		1	0	2	0
2	526	2	27.0007	0	25	0	26	0	0	0	1	0		1		0	1
2	531	1	32.4	0	17	0	21	0	0	1	1	0		0	0	0	0
2	535	1	26.2505	0	146	1	153	1	0	0	1	0		2	0	0	0
2	536	1	25.1472	0	25	0	26	0	0	0	1	0		1	1	0	1
2	538	1	30.2505	0	160	1	150	1	0	0	1	0		1	0	0	0
2	539	1	36.4189	0	34	0	32	0	0	0	1	0		0	0		0
2	542	1	44.4189	1	18	0	22	0	0	0	1	0		2	0	0	0
2	543	1	45.5852	1	80	1	48	1	0	0	1	0		1	0	0	1
2	546	1	30.9185	0	150	1	107	1	0	0	1	0		1	0	1	0
2	551	2	31.0856	0	34	0	32	0	0	1	1	0		1	1	1	0
2	552	2	30.2505	0	25	0	26	0	0	0	1	0		1	0	0	0
2	553	2	33.3361	0	30	0	29	0	0	0	1	0		0	0	1	0
2	554	2	27.0856	0	19	0	22	0	0	0	1	0		1	0		0
2	556	2	43.4196	1	79	1	57	1	0	0	1	0		0	0	1	0
2	558	1	38.3354	0	37	0	33	0	0	0	1	0		0	1	0	1
2	567	1	31.3374	0	70	1	69	1	0	0	1	0		2	0		0
2	568	2	25.6701	0	19	0	22	0	0	0	1	0		1	1	0	1
2	574	2	27.7755	0	19	0	22	0	1	0	1	1	1b	1	0	0	0
2	575	2	44.6708	1	25	0	26	0	1	0	1	1	2a	0	0	1	0
2	579	1	30.7488	0	19	0	22	0	0	0	1	0		1	0	0	0
2	583	1	28.167	0	30	0	29	0	1	0	1	1	1b	1	2		2
2	584	1	40.3368	1	19	0	23	0	1	0	1	1	1b/2a	2	1	0	1
2	585	1	40.9993	1	66	1	26	0	0	0	1	0		1	1	0	1
2	586	1	33.9	0	34	0	32	0	1	0	1	1	1b	1	0	0	0
2	587	1	31.7481	0	31	0	29	0	0	0	1	0		0	1	1	1
2	588	1	38.1656	0	25	0	26	0	0	0	1	0		2	0	1	0
2	590	1	33.9	0	19	0	23	0	1	0	1	1	1b	1	1	0	1
3	4	2	52.4	1	17	0	44	1	1	0	1	1	1b	1	0	0	0
3	5	2	63	1	44	1	84	1	1	0	1	1	1b	1	2
3	12	2	52.4	1	31	0	74	1	1	0	1	1	1b	1	1	0	1
3	13	2	72	1	30	0	37	0	0	0	1	0			0	0	0
3	16	2	69	1	24	0	50	1	1	0	1	1	1b	1	0	0	0
3	19	1	52.4	1	39	0	38	0	1	0	1	1	1b	1	0	0	0
3	20	1	71	1	14	0	25	0	1	0	1	1	1b	1	1	0	1
3	22	2	52.4	1	14	0	34	0	1	0	1	1	1b	1	1	0	1
3	23	2	52.4	1	16	0	35	0	1	0	1	1	?		0	0	0
3	24	1	54	1	34	0	118	1	1	0	1	1	1b	1	1	1	0
3	30	1	49	1	16	0	29	0	1	0	1	1	1b	1		0	0
3	31	2	48	1	4	0	35	0	1	0	1	1	1b	1	2
3	34	1	55	1	20	0	74	1	1	0	1	1	1b	1	2
3	37	1	65	1	86	1	106	1	1	0	1	1	1b	1	2
3	38	2	54	1	68	1	82	1	1	0	1	1	1b	1	2
3	41	1	61	1	46	1	49	1	1	0	1	1	1b	1	2
3	42	1	52.4	1	97	1	102	1	1	0	1	1	1b	1	2		0
3	45	2	34	0	47	1	50	1	1	0	1	1	1b	1	2
3	48	2	42	1	12	0	26	0	1	0	1	1	1b	1
3	52	2	63	1	52	1	77	1	1	0	1	1	1b	1
3	53	1	52.4	1	13	0	24	0	1	0	1	1	1b	1	2
3	55	2	54	1	18	0	35	0	0	0	1	0			0	0	0
3	56	2	62	1	8	0	20	0	1	0	1	1	1b	1	2
3	59	2	41	1	54	1	61	1	1	0	1	1	1b	1	1
3	62	1	52.4	1	99	1	126	1	1	0	1	1	1b	1	0	0	0
3	67	2	61	1	139	1	96	1	1	0	1	1	1b	1	2
3	68	2	52.4	1	7	0	22	0	0	0	1	0			2
3	69	2	54	1	10	0	31	0	0	0	1	0			2
3	77	2	52.4	1	57	1	70	1	1	0	1	1	?		2
3	83	2	65	1	1	0	38	0	1	0	1	1	1b	1	0	0	0
3	85	2	51	1	4	0	42.23	1	1	0	1	1	1b	1	0	1	0
3	87	1	64	1	46	1	42.23	1	1	0	1	1	1b	1	1	0	1
3	88	2	63	1	5	0	21	0	1	0	1	1	1b	1	0	1	0
3	90	2	52.4	1	21	0	42.23	1	1	0	1	1	1b	1	0	0	0
3	91	1	73	1	22	0	42.23	1	0	0	1	0			0	1	0
3	94	1	42	1	3	0	42.23	1	0	0	1	0			0	0	0
3	95	2	42	1	33	0	55	1	1	0	1	1	1b	1	0	0	0
3	99	2	68	1	12	0	24	0	1	0	1	1	1型	1	1	0	0
3	101	1	60	1	19	0	39	0	1	0	1	1	1b	1	1	0	2
3	103	2	54	1	9	0	23	0	1	0	1	1	1b	1	2
3	108	2	54	1	12	0	33	0	1	0	1	1	1b	1	2	1
3	112	2	56	1	13	0	21	0	1	0	1	1	1b	1	0	1	0
3	113	1	56	1	26	0	61	1	1	0	1	1	1b	1	0	0	0
3	117	2	58	1	21	0	28	0	1	0	1	1	1型	1	0	0	0
3	118	2	49	1	100	1	73	1	1	0	1	1	1b	1	1	0	1
3	128	1	49	1	14	0	35	0	1	0	1	1	1b	1	1	1	0
3	135	2	54	1	10	0	13	0	0	0	1	0			0	0	0
3	136	2	63	1	53	1	76	1	1	0	1	1	1b	1	0	0	0
3	139	1	52.4	1	17	0	32	0	1	0	1	1	1b	1	0	1	0
3	141	2	59	1	46	1	41	1	0	0	1	0			0	1	0
3	146	1	60	1	5	0	17	0	1	0	1	1	1b	1	0	1	0
3	154	2	52.4	1	5	0	14	0	1	0	1	1	1b	1	0	0	0
3	159	1	68	1	24	0	38	0	1	0	1	1	1b/3型	2	1	0	1
3	161	2	37	0	22	0	17	0	1	0	1	1	1b/3型	2	1	1	1
3	164	1	57	1	42	1	42.3	1	1	0	1	1	1b/3型	2	2	0	2
3	165	1	49	1	9	0	26	0	1	0	1	1	1b	1	2
3	166	2	57	1	1	0	20	0	1	0	1	1	1b	1	0	0	0
3	167	2	60	1	24	0	30	0	0	0	1	0			0	1	0
3	168	2	60	1	69	1	82	1	0	0	1	0			0		0
3	169	2	63	1	13	0	24	0	1	0	1	1	1b	1	1
3	170	1	67	1	19	0	29	0	1	0	1	1	1b	1	2
3	171	1	65	1	7	0	26	0	1	0	1	1	1b/3型	2	2
3	177	2	61	1	2	0	18	0	1	0	1	1	1b	1	2
3	179	2	49	1	20	0	46	1	1	0	1	1	1b	1	1
3	180	1	56	1	33	0	35	0	1	0	1	1	1b	1	2	1
3	181	1	51	1	2	0	19	0	0	0	1	0			0
3	187	2	57	1	4	0	15	0	0	0	1	0			2	1
3	190	2	47	1	20	0	37	0	1	0	1	1	1b	1	0	0	0
3	196	1	64	1	3	0	29	0	0	0	1	0					0
3	199	1	50	1	19	0	25	0	1	0	1	1	1b	1	2		0
3	200	2	54	1	10	0	29	0	1	0	1	1	1b/3型	2	2		0
3	202	1	58	1	12	0	30	0	1	0	1	1	1b	1	2		0
3	206	1	59	1	64	1	55	1	1	0	1	1	1b	1	0	0	2
3	208	2	64	1	25	0	40	1	1	0	1	1	1b	1	2	2	0
3	218	1	68	1	23	0	30	0	1	0	1	1	1b	1	2	2	0
3	219	2	66	1	20	0	29	0	1	0	1	1	1b	1	2		0
3	220	2	61	1	5	0	25	0	1	0	1	1	1b/3型	2	2	2	0
3	221	1	64	1	18	0	39	0	1	0	1	1	1b/3型	2	2	2	0
3	223	2	66	1	20	0	24	0	1	0	1	1	1型	1	2	2	0
3	225	2	38	0	34	0	65	1	1	1	1	1	?		2	2	0
3	227	2	43	1	1	0	15	0	1	0	1	1	1b	1	2	2	0
3	228	2	55	1	7	0	16	0	1	0	1	1	1b	1	2	2	0
3	232	2	61	1	26	0	41	1	1	0	1	1	1b/2型	2	2	2	0
3	233	2	64	1	38	0	69	1	1	0	1	1	1b	1	2	2	0
3	236	1	56	1	30	0	36	0	0	0	1	0			2	2	0
3	238	2	58	1	59	1	49	1	1	0	1	1	1b	1	2	2	0
3	240	2	53	1	25	0	45	1	1	0	1	1	1b/2型	2	2	2	0
3	241	1	49	1	5	0	23	0	0	0	1	0			2	2	0
3	243	2	55	1	1	0	14	0	1	0	1	1	1b	1	2	2	0
3	245	1	50	1	133	1	87	1	1	0	1	1	1b	1	2	2	0
3	246	2	59	1	1	0	9	0	0	0	1	0			2	2	0
3	247	2	52	1	4	0	16	0	0	0	1	0			2	2	0
3	248	2	61	1	4	0	19	0	1	0	1	1	?		2	2	0
3	249	1	45	1	33	0	44	1	1	0	1	1	1b	1	2	2	0
3	251	2	61	1	20	0	35	0	1	0	1	1	1b	1	2	2	0
3	252	1	63	1	163	1	154	1	1	0	1	1	1b	1	2	2	0
3	253	2	68	1	10	0	27	0	0	0	1	0			2	2	0
3	255	1	53	1	5	0	7	0	0	0	1	0			2	2	0
3	257	2	52.4	1	8	0	36	0	1	0	1	1	1b	1	2	2	0
3	258	1	44	1	16	0	28	0	1	0	1	1	1b	1	2	2	0
3	259	2	44	1	4	0	11	0	0	0	1	0			2	2	0
3	262	2	51	1	5	0	25	0	1	0	1	1	?		2	2	0
3	264	2	47	1	31	0	40	1	0	0	1	0	?		2	2	0
3	266	2	63	1	7	0	34	0	1	0	1	1	1b	1	2	2	0
3	267	1	47	1	43	1	32	0	1	0	1	1	1b	1	2	2	0
3	268	2	54	1	41	1	41	1	1	0	1	1	1b	1	2	2	0
3	270	2	55	1	10	0	25	0	1	0	1	1	?		2	2	0
3	275	2	55	1	24	0	45	1	1	0	1	1	1b	1	2	2	0
3	276	2	62	1	18	0	48	1	1	0	1	1	1b	1	2	2	0
3	277	2	49	1	12	0	14	0	0	0	1	0			1	2	0
3	278	2	70	1	3	0	27	0	1	0	1	1	?		2	2	0
3	279	1	49	1	3	0	42.23	1	1	0	1	1	1b	1	2	2	0
3	281	2	55	1	2	0	22	0	0	0	1	0			2	2	0
3	286	1	59	1	19	0	44	1	1	0	1	1	1b	1	2	2	0
3	291	2	61	1	29	0	49	1	1	0	1	1	1型	1			2
3	306	2	49	1	3	0	18	0	1	0	1	1	1b	1	2		0
3	307	1	62	1	113	1	122	1	1	0	1	1	1b	1	2		0
3	309	2	50	1	21	0	43	1	1	0	1	1	1b	1	0	0	0
3	311	2	47	1	5	0	19	0	1	0	1	1	1与1b混	1		2	0
3	312	2	66	1	4	0	21	0	0	0	1	0			2	2	0
3	316	1	46	1	19	0	28	0	0	0	1	0			2	2	0
3	319	2	56	1	27	0	36	0	0	0	1	0			2		0
3	320	2	52.4	1	16	0	57	1	1	0	1	1	1b	1	2	1	0
3	326	1	70	1	38	0	42	1	1	0	1	1	1b	1	2	2	0
3	327	1	74	1	100	1	116	1	1	0	1	1	?		2	2	0
3	328	2	44	1	3	0	9	0	1	0	1	1	1b	1	2	2	0
3	329	2	42	1	38	0	22	0	1	0	1	1	?		2	2	0
3	334	2	52.4	1	22	0	82	1	1	0	1	1	?		2	2	0
3	338	1	69	1	27	0	86	1	1	0	1	1	1b	1	2	2	0
3	344	2	45	1	13	0	42	1	1	0	1	1	1b	1	2	2	0
3	352	1	56	1	13	0	33	0	1	0	1	1	?		2	2	0
3	358	1	49	1	17	0	28	0	1	0	1	1	1b	1	2	2	0
3	359	2	55	1	4	0	16	0	1	0	1	1	1b	1	2	2	0
3	361	2	54	1	47	1	53	1	1	0	1	1	1b	1	2	2	0
3	367	2	55	1	23	0	29	0	1	0	1	1	1b/3型	2	2	2	0
3	368	2	64	1	52	1	67	1	1	0	1	1	1b	1	2	2	0
3	370	1	57	1	2	0	21	0	1	0	1	1	1b	1	2	2	0
3	376	2	52.4	1	10	0	30	0	1	0	1	1	1b	1	2	2	0
3	377	2	55	1	300	1	303	1	1	0	1	1			2	2	0
3	378	2	57	1	17	0	36	0	1	0	1	1	1b	1	2	2	0
3	380	2	52.4	1	30	0	89	1	1	0	1	1	1b	1	2	2	0
3	381	2	54	1	14	0	51	1	1	0	1	1	1b/2型	2	2	2	0
3	382	2	60	1	18	0	28	0	1	0	1	1	1b	1	2	2	0
3	388	2	52.4	1	13	0	34	0	1	0	1	1	1b	1	2	2	0
3	391	2	47	1	3	0	44	1	1	0	1	1	1b	1	2	2	0
3	392	1	58	1	80	1	87	1	1	0	1	1	1b	1	2	2	0
3	393	1	50	1	27	0	46	1	1	0	1	1	1b	1	2	2	0
3	394	2	52	1	31	0	30	0	1	0	1	1	1b?	1	2	2	0
3	395	2	54	1	8	0	45	1	1	0	1	1	1b	1	2	2	0
3	397	2	52.4	1	71	1	156	1	1	0	1	1	1b	1		2	0
3	398	2	52.4	1	5	0	18	0	1	0	1	1	1b	1	2	2	0
3	399	2	62	1	3	0	28	0	1	0	1	1	1b	1	2	2	0
3	403	2	64	1	5	0	24	0	1	0	1	1	1b	1	2	2	0
3	406	2	48	1	26	0	33	0	1	0	1	1	1b	1	2	2	0
3	410	2	57	1	3	0	13	0	1	0	1	1	1b	1	2	2	0
3	413	2	54	1	57	1	67	1	1	0	1	1	1b	1	2	2	0
3	417	2	47	1	6	0	19	0	1	0	1	1	1型	1	2	2	0
3	422	1	48	1	8	0	17	0	1	0	1	1	1b	1	0	0	0
3	423	2	62	1	32	0	61	1	1	0	1	1	1b	1	2	2	0
3	424	1	52.4	1	31	0	57	1	1	0	1	1	1b	1		2	0
3	426	2	55	1	14	0	53	1	1	0	1	1	1b	1	2	2	0
3	428	2	60	1	21	0	64	1	1	0	1	1	1型	1	1	2	0
3	431	2	59	1	8	0	32	0	1	0	1	1	1b	1	2	2	0
3	433	1	60	1	44	1	63	1	0	0	1	0			2	2	0
3	434	2	46	1	22	0	46	1	1	0	1	1	1b	1	2	2	0
3	435	2	59	1	107	1	132	1	1	0	1	1	1b	1	2	2	0
3	436	2	55	1	21	0	37	0	1	0	1	1	1b	1	2	2	0
3	437	2	55	1	15	0	46	1	1	0	1	1	1b	1	2	2	0
3	440	2	62	1	13	0	63	1	1	0	1	1	1b	1	2	2	0
3	441	1	67	1	33	0	40	1	1	0	1	1	1b	1	2	2	0
3	444	2	52	1	18	0	38	0	1	0	1	1	1b	1	2	2	0
3	446	2	52.4	1	3	0	14	0	1	0	1	1	1b	1	2	2	0
3	448	2	47	1	32	0	34	0	1	0	1	1	1b	1	2	2	0
3	449	2	55	1	1	0	17	0	1	0	1	1	1b	1	2	2	0
3	454	2	64	1	20	0	26	0	0	0	1	0			2	2	0
3	456	1	66	1	131	1	253	1	1	0	1	1	1b	1	2	2	0
3	459	2	57	1	99	1	137	1	1	0	1	1	1b	1	2	2	0
3	460	1	45	1	17	0	57	1	1	0	1	1	1b	1	2	2	0
3	461	2	49	1	4	0	20	0	1	0	1	1	1b	1	2	2	0
3	462	2	52	1	123	1	198	1	1	0	1	1	1b	1	2	2	0
3	463	2	52.4	1	39	0	55	1	1	0	1	1	1b	1	2	2	0
3	464	2	56	1	3	0	25	0	1	0	1	1	1b	1	2	2	0
3	467	2	52.4	1	18	0	50	1	1	0	1	1	1b	1	2	2	0
3	468	1	72	1	23	0	30	0	1	0	1	1	1b	1	2	2	0
3	469	1	50	1	50	1	89	1	1	0	1	1	1b	1	2	2	0
3	471	2	49	1	13	0	29	0	1	0	1	1	1b	1	2	2	0
3	472	2	64	1	4	0	32	0	0	0	1	0			2	2	0
3	473	2	66	1	21	0	36	0	1	0	1	1	1b	1	2	2	0
3	475	2	42	1	20	0	32	0	1	0	1	1	1b	1	2	2	0
3	482	2	69	1	13	0	43	1	0	0	1	0			2	2	0
3	483	1	55	1	30	0	56	1	1	0	1	1	1b	1	2	2	0
3	484	2	50	1	121	1	158	1	1	0	1	1	1b	1	2	2	0
3	485	1	45	1	54	1	45	1	1	0	1	1	1b	1	2	2	0
3	486	2	55	1	9	0	32	0	1	0	1	1	1b	1	2	2	0
3	490	2	66	1	26	0	36	0	0	0	1	0			2	2	0
3	504	1	52.4	1	10	0	26	0	1	0	1	1	1b	1	0		1
3	509	2	52.4	1	17	0	37	0	1	0	1	1	1b	1	0	0	1
3	520	2	53	1	5	0	16	0	1	0	1	1	?		0	1	1
3	524	2	44	1	6	0	11	0	0	0	1	0			2	2	0
3	525	1	64	1	11	0	20	0	1	0	1	1	1b	1	2	2	0
3	528	2	62	1	15	0	46	1	1	0	1	1	1型	1	2	2	0
3	529	2	46	1	21	0	31	0	1	0	1	1	1b?	1	2	2	0
3	533	2	59	1	56	1	67	1	1	0	1	1	1b	1	2	2	0
3	535	2	46	1	5	0	21	0	1	0	1	1	1b	1	2	2	0
3	536	1	50	1	5	0	42.23	1	1	0	1	1	1b	1	2	2	0
3	538	1	39	0	14	0	27	0	1	0	1	1	1b	1	2	2	0
3	539	2	65	1	32	0	48	1	1	0	1	1	1b	1	2	2	0
3	540	1	63	1	24	0	32	0	1	0	1	1	1b	1		0	2
3	541	2	49	1	85	1	61	1	1	0	1	1	1b	1	2	2	0
3	544	2	61	1	11	0	25	0	0	0	1	0			0	1	1
3	547	1	52.4	1	43	1	49	1	1	0	1	1	1b	1	0	1	1
3	548	2	77	1	98	1	180	1	1	0	1	1	1型	1	0	0	0
3	551	2	50	1	13	0	25	0	1	0	1	1	1b	1	2	2	0
3	552	1	58	1	29	0	114	1	1	0	1	1	1b	1		1	2
3	556	2	52	1	10	0	15	0	1	0	1	1	1b	1	2	2	0
3	558	1	63	1	108	1	201	1	1	0	1	1	1b	1	1	0	2
3	560	2	56	1	4	0	24	0	1	1	1	1	1b	1	2	2	0
3	564	2	52.4	1	6	0	18	0	1	0	1	1			0		1
3	567	2	47	1	5	0	10	0	1	0	1	1	1b	1	0	0	1
3	568	2	52.4	1	2	0	34	0	0	0	1	0			0	0	1
3	569	2	50	1	1	0	28	0	1	0	1	1			2		0
3	570	2	66	1	21	0	37	0	1	0	1	1			2	2	0
3	584	2	55	1	27	0	28	0	1		1	1	1b，2混合		0	1	0
3	588	2	64	1	33	0	35	0	0		1	0			0	0	0
3	591	1	59	1	44	1	44	1	1		1	1	1b		0	0	0
3	592	2	49	1	21	0	18	0	1		1	1				0	0
3	593	1	60	1	86	1	71	1	1		1	1	1b，3混合		0	0	0
3	595	2	45	1	14	0	19	0	0		1	0					1
3	596	1	57	1	36	0	33	0	1		1	1	1b		0	1	0
3	597	2	58	1	74	1	76	1	1		1	1	1a		0	0	0
3	600	2	48	1	18	0	21	0	1		1	1	1b		0	0	0
3	602	2	56	1	42	1	38	0	1		1	1	1b		0	1	0
3	603	1	62	1	31	0	35	0	1		1	1	1b		0	0	0
3	607	2	57	1	27	0	27	0	1		1	1	1b		0	0	0
3	608	2	60	1	49	1	56	1	1		1	1	1b		0	1	0
3	610	2	73	1	44	1	36	0	1		1	1	1b		1	1	1
3	611	2	49	1	36	0	40	1	1		1	1	1b，3混合		0	1	0
3	616	2	70	1	41	1	36	0	0		1	0			0	0	0
3	618	2	62	1	149	1	115	1	0		1	0	2,3,1b混合		0	0	0
3	619	1	52.4	1	98	1	80	1	1		1	1	1b		0	0	0
3	621	2	64	1	23	0	25	0	0		1	0			0		0
3	624	2	44	1	47	1	41	1	1		1	1	2,3,1b混合		0	0	0
3	626	2	68	1	31	0	28	0	1		1	1	1b，3混合		0	0	0
3	628	2	54	1	26	0	29	0	0		1	0			0	0	0
3	631	2	67	1	44	1	39	0	0		1	0			0	0	0
3	633	2	60	1	62	1	53	1	0		1	0	1b		0	0	0
3	635	2	62	1	33	0	32	0	0		1	0			0	1	0
3	637	1	65	1	50	1	45	1	1		1	1	1b		0	1	1
3	638	2	69	1	45	1	37	0	1		1	1	1b		0	0	0
3	639	1	58	1	40	1	38	0	1		1	1	1b		0	0	0
3	640	2	57	1	31	0	27	0	0		1	0	1b		1	1	1
3	641	2	45	1	17	0	21	0	1		1	1	1a,3混合		0	0	0
3	642	2	49	1	65	1	55	1	0		1	0			0	0	0
3	643	2	67	1	178	1	152	1	1		1	1	1b，3混合		0	1	0
3	644	2	62	1	52	1	51	1	1		1	1	1a		0	1	0
3	645	2	62	1	201	1	141	1	0		1	0			0	1	0
3	647	2	50	1	68	1	35	0	0		1	0	1b		0	1	0
3	649	2	67	1	94	1	145	1	1		1	1	2		0	0	0
3	650	2	61	1	36	0	36	0	0		1	0			0	0	0
3	653	2	49	1	14	0	21	0	1		1	1	1b，3混合		0	0	0
3	659	2	57	1	45	1	44	1	0		1	0			1	1	0
3	662	2	58	1	21	0	28	0	1		1	1	1a		0	0	0
3	663	1	50	1	48	1	43	1	0		1	0			1	1	1
3	667	2	51	1	13	0	21	0	1		1	1	1a		0	0	0
3	668	2	60	1	42	1	42.3	1	1		1	1	1b，2混合		0	1
3	669	2	51	1	16	0	21	0	1		1	1	1b			1	0
3	670	2	56	1	65	1	55	1	1		1	1	1b，2混合		1	1	1
3	671	1	59	1	108	1	177	1	1		1	1	1b		0	1	1
3	672	2	51	1	40	1	37	0	0		1	0			0	0	0
3	674	2	49	1	31	0	30	0	1		1	1	1b，3混合		0	0	0
3	675	1	60	1	25	0	31	0	1		1	1	1b		1	0	1
3	676	2	50	1	26	0	25	0	1		1	1	1b，3混合		1	0	1
3	677	2	73	1	97	1	82	1	0		1	0			0	1	0
3	680	2	50	1	21	0	25	0	1		1	1	1b，3混合			0	1
3	683	2	57	1	37	0	36	0	1		1	1	1b，3混合		0	1	0
3	684	1	66	1	34	0	30	0	1		1	1	1b，3混合		0	0	0
3	685	1	57	1	19	0	21	0	1		1	1	1b		0	0	0
3	688	1	78	1	22	0	25	0	1		1	1	1a		0	1	0
3	689	2	47	1	114	1	81	1	1		1	1	1a		0	0	0
3	695	2	46	1	31	0	24	0	0		1	0			0	0	0
3	697	1	51	1	42	1	45	1	1		1	1	3		0	0	0
3	700	2	62	1	32	0	33	0	0		1	0			0	0	0
3	702	2	68	1	36	0	37	0	1		1	1	1a		0	0	0
3	703	2	48	1	108	1	74	1	1		1	1	1a		1	0	1
3	705	2	62	1	97	1	87	1	0		1	0			0	0	0
3	706	1	51	1	83	1	49	1	1		1	1	1a		0	1	0
3	707	2	47	1	50	1	84	1	1		1	1	1b		0	0	0
3	708	2	46	1	78	1	46	1	1		1	1	1a		0	0	0
3	709	1	63	1	35	0	40	1	0		1	0			1	0	1
3	710	2	60	1	39	0	32	0	1		1	1	1b		1	0	1
3	713	2	58	1	49	1	48	1	1		1	1	1b			0	0
3	714	2	59	1	60	1	47	1	1		1	1	1b		1	0	1
3	715	2	49	1	59	1	60	1	0		1	0			0	0	0
3	716	2	61	1	26	0	28	0	1		1	1	1b		0	1	0
3	718	2	61	1	13	0	15	0	1		1	1	1b		0	0	0
3	719	2	49	1	14	0	19	0	1		1	1	1b		0	1	0
3	721	2	49	1	25	0	26	0	1		1	1	1a		0	0	0
3	722	2	61	1	20	0	26	0	0		1	0			1	1	1
3	723	1	40	0	161	1	87	1	0		1	0			0	0	0
3	724	2	57	1	103	1	78	1	0		1	0			0	1	0
3	726	2	46	1	32	0	36	0	1		1	1	1a，2混合		0	0	0
3	728	1	50	1	21	0	19	0	1		1	1	1b，3混合		0	0	0
3	730	2	73	1	59	1	69	1	1		1	1	1a，2混合		2	0	2
3	731	1	44	1	50	1	34	0	1		1	1	1a		0	0	0
3	732	2	66	1	106	1	76	1	1		1	1	1b		2	0	2
3	733	2	63	1	120	1	85	1	1		1	1	1b		0	0	0
3	734	2	55	1	27	0	26	0	1		1	1	1b，3混合		0	1	0
3	735	2	56	1	18	0	25	0	0		1	0			1	0	1
3	737	2	62	1	17	0	18	0	1		1	1	1a		0	1	0
3	739	2	45	1	40	1	29	0	0		1	0			0	1	0
3	740	2	67	1	42	1	42.3	1	1		1	1	1a		0	0	0
3	743	2	60	1	48	1	45	1	0		1	0			0		1
3	746	1	52	1	142	1	143	1	1		1	1	1a,3		0	1	0
3	748	1	65	1	54	1	42	1	1		1	1	1b		0	0	0
3	749	2	64	1	19	0	26	0	1		1	1	1b,3		1		1
3	750	2	57	1	36	0	32	0	1		1	1	1b,3		0	0	0
3	751	1	68	1	164	1	202	1	1		1	1	1a		0		0
3	753	2	45	1	39	0	41	1	0		1	0			0	1	0
3	754	2	52.4	1	262	1	188	1	1		1	1	1b,3		0	0	0
3	755	1	52.4	1	52	1	49	1	1		1	1	1b,3		0	0
3	757	2	52	1	39	0	35	0	1		1	1	1b		2		1
3	759	2	65	1	111	1	126	1	1		1	1	1b,2		0	0
3	760	1	62	1	33	0	33	0	1		1	1	1a,2,3		0	0	0
3	761	1	59	1	81	1	64	1	1		1	1	1b		0	0
3	762	2	66	1	59	1	50	1	1		1	1	1b		0		1
3	764	1	50	1	138	1	88	1	1		1	1	1b		2		1
3	766	1	64	1	41	1	33	0	1		1	1	1b,2,3		0	0	0
3	767	2	48	1	57	1	46	1	1		1	1	3		1	0	1
3	768	2	59	1	41	1	38	0	1		1	1	1b,2,3		0	1	0
3	771	2	52.4	1	92	1	63	1	1		1	1	2,3			0	0
3	772	1	67	1	195	1	196	1	1		1	1	3		0	0	0
3	775	2	49	1	23	0	24	0	0		1	0			0	0	0
3	777	1	58	1	78	1	79	1	1		1	1	1b,3		0	0	0
3	778	1	48	1	34	0	30	0	1		1	1	1b		0	0	0
3	779	2	64	1	57	1	68	1	1		1	1	1b,3		0	0	0
3	780	2	47	1	21	0	22	0	1		1	1	1b		0	0	0
3	784	2	54	1	17	0	20	0	1		1	1	1b,2,3		0	0	0
3	785	2	63	1	32	0	32	0	1		1	1	1b,3		0	0	1
3	786	2	64	1	41	1	44	1	1		1	1	1b		0	2	0
3	788	1	69	1	20	0	23	0	1		1	1	1b,2,3		0		0
3	790	2	62	1	202	1	164	1	1		1	1	1b,2,3		0	0	0
3	791	2	65	1	14	0	15	0	1		1	1	1b,2,3		0	1	0
3	793	2	49	1	53	1	46	1	1		1	1	1b,2,3		0	1	0
3	794	2	64	1	131	1	96	1	1		1	1	1b,2,3		0	0	0
3	796	2	66	1	41	1	44	1	1		1	1	3		1	0	0
3	798	1	55	1	52	1	36	0	1		1	1	1b		0	0	0
3	802	2	60	1	37	0	32	0	1		1	1	1b,3				1
3	804	1	62	1	90	1	59	1	1		1	1	1b,3		1	0	1
3	805	2	59	1	110	1	115	1	1		1	1	2,3			0	1
3	807	1	61	1	22	0	32	0	1		1	1	1a,3		2		1
3	810	2	57	1	18	0	23	0	1		1	1	1b,3		2		1
3	811	2	51	1	16	0	16	0	1		1	1	1a,2,3		1	0	1
3	812	1	51	1	45	1	38	0	1		1	1	1b,3		0
3	813	1	67	1	22	0	30	0	1		1	1			0	0	0
3	815	2	67	1	21	0	28	0	1		1	1	1b,2,3				1
3	816	2	55	1	22	0	18	0	1		1	1	1b,3		0	0	0
3	817	2	60	1	37	0	36	0	1		1	1	1a,3		2		1
3	819	2	53	1	57	1	40	1	0		1	0			0	0	0
3	821	2	58	1	18	0	30	0	1		1	1	1b,2,3		0
3	822	2	65	1	30	0	34	0	1		1	1	3		0	0	0
3	824	2	59	1	18	0	20	0	1		1	1	1b,3		1	0	1
3	825	2	61	1	82	1	61	1	0		1	0			0	0	0
3	827	2	48	1	43	1	44	1	0		1	0			0		0
3	829	1	50	1	173	1	105	1	0		1	0			0	0	0
3	830	1	66	1	100	1	88	1	0		1	0			0	0	0
3	831	2	64	1	128	1	120	1	1		1	1	1b		0	0	0
3	832	2	62	1	66	1	56	1	0		1	0			0	0	0
3	833	1	55	1	20	0	24	0	1		1	1	1b		0	1	0
3	835	1	61	1	79	1	69	1	1		1	1	1a,3		0	0	0
3	836	2	59	1	23	0	19	0	1		1	1	1b,3		0	0	0
3	837	2	62	1	21	0	29	0	1		1	1	1b,2,3		0	1	0
3	838	1	63	1	58	1	72	1	1		1	1	1b,3		0	0	0
3	839	2	60	1	15	0	19	0	1		1	1	1a,3		0	0	0
3	841	2	59	1	27	0	26	0	1		1	1	1b,3		0	0	0
3	842	1	57	1	55	1	83	1	1		1	1	1b,3		1	0	1
3	843	1	59	1	64	1	66	1	1		1	1	1b,3		1	0	1
3	844	2	69	1	73	1	72	1	1		1	1	1b,3		0	0	0
3	845	1	64	1	117	1	100	1	1		1	1	1b		1	0	1
3	846	1	49	1	19	0	21	0	1		1	1	1b,3		0	0	0
3	848	2	51	1	33	0	32	0	1		1	1	1b,2		0		0
3	849	1	67	1	50	1	48	1	1		1	1	1b,3		0	1	0
3	850	2	56	1	32	0	35	0	1		1	1	1b,3		0	0	1
3	851	2	59	1	15	0	19	0	1		1	1	1b		0	0	0
3	852	2	46	1	52	1	46	1	1		1	1	1b,2,3		0	1	0
3	853	2	63	1	25	0	22	0	1		1	1	1b,3		0	0	0
3	854	2	51	1	33	0	35	0	1		1	1	1b,3		0	0	0
3	855	1	59	1	24	0	30	0	1		1	1	1b,3		0	0	0
3	856	2	59	1	30	0	37	0	1		1	1	1b,3		1	0	1
3	857	1	53	1	25	0	31	0	1		1	1	1b,2,3		1	0	0
3	858	2	59	1	32	0	33	0	1		1	1	1b,3		2	0	0
3	859	1	52.4	1	31	0	33	0	1		1	1	1a,3			0	0
3	860	2	52.4	1	34	0	28	0	1		1	1	1a,3		0
3	861	2	52.4	1	29	0	31	0	1		1	1	1b,3		0	0	0
3	863	2	52.4	1	48	1	49	1	1		1	1	1a,3		1		1
3	864	2	43	1	32	0	28	0	1		1	1	1b,2,3		1	1	1
3	866	1	58	1	48	1	37	0	1		1	1	1b,2,3		0	1	0
3	867	1	52.4	1	29	0	27	0	0		1	0			1	0	1
3	868	2	52.4	1	60	1	56	1	1		1	1	1b,2,3		0	0	0
3	869	1	52.4	1	24	0	29	0	1		1	1	1b,2,3		0	1	0
3	870	2	52.4	1	34	0	30	0	0		1	0			0	1	0
3	871	2	63	1	24	0	36	0	1		1	1	1b,3		1	0	1
3	876	1	66	1	48	1	55	1	1		1	1	1b,2		0	0	0
3	879	1	68	1	49	1	48	1	0		1	0			1	1
3	880	1	66	1	52	1	47	1	1		1	1	1b,3		1	0	0
3	881	2	60	1	63	1	61	1	0		1	0			1	0	1
3	883	2	69	1	160	1	202	1	1		1	1	1a,3		0	1	0
3	884	2	69	1	19	0	27	0	0		1	0			0	0	0
3	885	2	59	1	17	0	23	0	0		1	0			0	0	0
3	886	2	63	1	63	1	75	1	1		1	1	1b,3		0	2	0
3	889	2	58	1	28	0	24	0	1		1	1	1a,3		0		0
3	890	2	63	1	23	0	30	0	0		1	0			0	0	0
3	891	2	50	1	21	0	26	0	1		1	1	1b,2,3		0	1	0
3	892	2	49	1	86	1	65	1	0		1	0			0		1
3	893	2	58	1	89	1	105	1	1		1	1	1a,3		0	0	0
3	895	2	49	1	24	0	21	0	1		1	1	1b,3		0	1	0
3	899	2	63	1	62	1	52	1	1		1	1	1b,2,3		0	0	0
3	900	2	69	1	28	0	30	0	1		1	1	1b,3		0	0	0
3	901	1	64	1	35	0	32	0	0		1	0			0	0	0
3	902	2	58	1	16	0	19	0	1		1	1	1a,3		0	0	0
3	904	2	48	1	50	1	39	0	0		1	0			0	0	0
3	905	2	61	1	28	0	25	0	0		1	0			1	0	1
3	906	1	48	1	69	1	50	1	0		1	0			0	0	0
3	908	2	51	1	54	1	66	1	0		1	0			1	0	1
3	910	2	59	1	96	1	102	1	0		1	0			1	1	0
3	911	2	55	1	70	1	81	1	1		1	1	1a,3		0	0	0
3	912	2	69	1	46	1	48	1	1		1	1	1b		0	0	0
3	913	2	61	1	70	1	66	1	0		1	0			1	0	0
3	914	1	69	1	210	1	260	1	0		1	0			0	0	0
3	915	1	51	1	35	0	30	0	0		1	0			0	0	0
3	918	2	59	1	23	0	40	1	1		1	1	1a,3		0	0	0
3	919	1	57	1	26	0	34	0	0		1	0			0	0
3	922	1	55	1	73	1	44	1	0		1	0			1	0	1
3	923	2	56	1	44	1	40	1	1		1	1	1a,3		0	0	0
3	928	2	43	1	22	0	22	0	1		1	1	1a,3		0	0	0
3	929	1	77	1	37	0	34	0	0		1	0			0	0	1
3	930	2	58	1	19	0	19	0	1		1	1	1a,3		1	0	1
3	932	1	55	1	37	0	27	0	1		1	1	1a		0	0	0
3	933	2	52.4	1	39	0	32	0	0		1	0			1	1	1
3	935	2	44	1	19	0	22	0	1		1	1	1b,3		0	0	0
3	936	2	52	1	105	1	75	1	1		1	1	1a,3		0	0	0
3	938	2	54	1	145	1	121	1	1		1	1	1a,3		0	1	0
3	941	1	55	1	57	1	46	1	1		1	1	1b		0	0	0
3	942	2	99	1	43	1	47	1	1		1	1	1b,3		0	0	0
3	943	1	54	1	58	1	47	1	0		1	0			0	1	0
3	946	2	48	1	16	0	16	0	0		1	0			0	0	0
3	947	2	65	1	43	1	46	1	1		1	1	1b		0	0	0
3	949	2	62	1	34	0	34	0	1		1	1	1b		0	1	0
3	950	2	65	1	15	0	26	0	1		1	1	1b,3		0	0	0
3	951	2	57	1	16	0	20	0	1		1	1	1b,3		0	1	0
3	952	2	62	1	33	0	29	0	1		1	1	1b		0	0	0
3	954	2	58	1	18	0	20	0	1		1	1	1b		0	0	0
3	955	2	66	1	165	1	154	1	0		1	0			0	0	0
3	956	2	54	1	28	0	31	0	1		1	1	1b,3			1	0
3	960	2	65	1	66	1	65	1	0		1	0			0	0	0
3	961	2	61	1	30	0	29	0	1		1	1	1b,3		0	0	0
3	963	2	61	1	87	1	138	1	1		1	1	1b		0	0	1
3	964	2	68	1	22	0	28	0	1		1	1	1b,3		0	1	0
3	965	2	62	1	24	0	24	0	1		1	1	1b		0	1	0
3	966	2	61	1	41	1	39	0	1		1	1	1b		0	1	0
3	967	2	53	1	109	1	87	1	0		1	0			0	1	0
3	968	1	61	1	147	1	149	1	0		1	0			0	0	0
3	969	2	59	1	13	0	20	0	1		1	1	1b,3		0	0	0
3	970	1	62	1	43	1	46	1	0		1	0			1	1	2
3	971	2	65	1	69	1	68	1	1		1	1	1b,2,3		2	0	0
3	972	2	65	1	16	0	20	0	1		1	1	1b,3		0	0	0
3	973	2	55	1	21	0	23	0	1		1	1	1b		0	1	0
3	975	2	59	1	62	1	66	1	1		1	1	1b,3		0	0	1
3	976	1	67	1	28	0	35	0	1		1	1	1b		0	0	0
3	977	2	50	1	32	0	29	0	1		1	1	1b		0	0	0
3	978	2	43	1	42	1	34	0	0		1	0			0	0	0
3	979	1	66	1	104	1	87	1	0		1	0			0	1	0
3	980	2	49	1	15	0	21	0	1		1	1	1b,3		0	0	0
3	983	2	66	1	46	1	38	0	1		1	1	1b,3		0	0	0
3	984	2	57	1	26	0	21	0	1		1	1	1b		0	0	0
3	985	1	65	1	82	1	75	1	1		1	1	1b		0	0	0
3	988	2	62	1	53	1	44	1	1		1	1	1b,3		0	1	0
3	989	2	63	1	119	1	75	1	1		1	1	1b		1	0	0
3	990	2	43	1	19	0	16	0	0		1	0			1	0	0
3	991	2	44	1	42	1	48	1	1		1	1	1b,3		1	0	0
3	992	2	47	1	26	0	29	0	1		1	1	1b,3		0	0	0
3	993	2	66	1	108	1	83	1	1		1	1	1b,3		0	1	1
3	994	2	67	1	40	1	31	0	1		1	1	1b,3		0	0	0
3	995	2	63	1	150	1	117	1	1		1	1	1b		0	0	0
3	998	2	65	1	21	0	27	0	1		1	1	1b		1	0	1
3	999	2	48	1	42	1	42.3	1	0		1	0			0	0	0
3	1000	2	63	1	29	0	29	0	0		1	0			0	1	0
3	1005	2	47	1	81	1	72	1	1		1	1	1b,3		0	2	0
3	1006	2	52	1	173	1	137	1	1		1	1	1b		0	1	0
3	1007	2	59	1	30	0	36	0	1		1	1	1b		0	0	1
3	1009	2	44	1	37	0	30	0	1		1	1	1b,3		0	0	0
3	1011	2	52	1	62	1	48	1	1		1	1	1b		0	0	0
3	1012	2	48	1	18	0	23	0	1		1	1	1b,3		0	0	0
3	1014	2	61	1	37	0	63	1	1		1	1	3		0	0	1
3	1015	2	50	1	22	0	23	0	0		1	0			0	0	1
3	1016	1	47	1	64	1	49	1	0		1	0			0	0	0
3	1017	2	52	1	34	0	40	1	1		1	1	1b		1	0	1
3	1018	2	47	1	18	0	21	0	0		1	0			0	0	0
3	1022	2	59	1	80	1	63	1	1		1	1	1b		0	1	0
3	1025	2	51	1	35	0	35	0	0		1	0			0	0	0
3	1026	2	47	1	13	0	18	0	1		1	1	1b		0	0	1
3	1027	2	60	1	129	1	117	1	1		1	1	1b,3		0	0	0
3	1028	2	60	1	66	1	69	1	1		1	1	1b		2	2	0
3	1029	2	60	1	93	1	62	1	1		1	1	1b		0	0	0
3	1031	1	71	1	24	0	28	0	0		1	0			1	0	1
3	1032	2	58	1	21	0	29	0	0		1	0			0	0	0
3	1033	2	60	1	110	1	144	1	1		1	1	1b,3		0	0	0
3	1035	1	51	1	265	1	159	1	1		1	1	1b,3		0	0	0
3	1036	2	49	1	26	0	28	0	0		1	0			0	0	0
3	1037	2	42	1	19	0	23	0	0		1	0			0	0	1
3	1038	2	53	1	38	0	12	0	1		1	1	1a		1	0	0
3	1040	2	47	1	74	1	54	1	1		1	1	1b		0	0	1
3	1043	1	60	1	37	0	44	1	1		1	1	1b,2,3		2	1	0
3	1044	2	50	1	32	0	27	0	1		1	1	1b		0	1	1
3	1045	2	54	1	77	1	70	1	0		1	0			0	0	0
3	1046	2	47	1	73	1	46	1	1		1	1	1b,3		0	0	0
3	1047	2	65	1	50	1	56	1	1		1	1	1b,3		0	1	0
3	1048	2	52.4	1	84	1	78	1	1		1	1	1b,3		0	1	1
3	1049	2	56	1	71	1	53	1	1		1	1	1b,3		0	0	0
3	1050	1	64	1	99	1	84	1	1		1	1	1b,3		0	1	0
3	1052	2	42	1	14	0	14	0	1		1	1	1b		0	0	0
3	1053	2	64	1	20	0	22	0	1		1	1	1b		0	1	0
3	1054	2	57	1	53	1	57	1	1		1	1	1b,2,3		1	2	0
3	1055	2	46	1	43	1	36	0	1		1	1	1b,3		0	0	0
3	1056	2	51	1	18	0	19	0	1		1	1	1b		0	0	0
3	1057	2	61	1	19	0	18	0	1		1	1	1b,3		0	1	0
3	1058	2	59	1	40	1	41	1	1		1	1	1b,3		0	1	0
3	1059	2	65	1	22	0	27	0	1		1	1	1b,3		0	0	0
3	1060	2	57	1	14	0	18	0	0		1	0			0	0	0
3	1061	2	58	1	203	1	138	1	0		1	0			0	1	1
3	1063	2	63	1	52	1	41	1	1		1	1	1b		0	1	0
3	1067	2	59	1	40	1	36	0	1		1	1	1b,2,3		1	0	0
3	1068	2	58	1	134	1	130	1	1		1	1	1b		0	0	0
3	1070	2	62	1	50	1	43	1	1		1	1	1b		0	0	0
3	1071	2	62	1	38	0	37	0	1		1	1	1b,2,3		0	0	1
3	1072	1	65	1	53	1	48	1	1		1	1	1a		1	0	0
3	1073	2	73	1	12	0	17	0	0		1	0			1	0	1
3	1074	2	68	1	35	0	43	1	0		1	0			0	1	0
3	1075	2	70	1	42	1	49	1	1		1	1	1b		0		0
3	1076	2	61	1	46	1	50	1	1		1	1	1b		1	0	0
3	1077	2	49	1	35	0	31	0	1		1	1	1b		0	0	0
3	1078	2	58	1	77	1	60	1	1		1	1	1a		0	1	0
3	1079	2	50	1	58	1	44	1	1		1	1	1b		0	0	0
3	1080	2	47	1	53	1	45	1	1		1	1	1b,3		0	0	0
3	1082	2	64	1	54	1	79	1	1		1	1	1b,3		0	0	1
3	1083	2	64	1	74	1	93	1	1		1	1	1b		1	1	0
3	1084	2	59	1	44	1	42	1	1		1	1	1b		0	0	1
3	1087	2	42	1	22	0	30	0	0		1	0			0	1	0
3	1089	2	46	1	51	1	53	1	1		1	1	1b		1	0	1
3	1091	2	63	1	19	0	20	0	0		1	0			0	0	0
3	1092	2	62	1	84	1	88	1	1		1	1	1b		0	1	0
3	1093	2	63	1	28	0	28	0	1		1	1	1b,3		0	2	0
3	1094	1	65	1	74	1	92	1	0		1	0			2	0	0
3	1095	2	57	1	35	0	32	0	0		1	0			0	1	0
3	1096	2	50	1	23	0	19	0	1		1	1	1b		0	0	0
3	1099	2	51	1	20	0	24	0	1		1	1	1b,3		0	0	0
3	1100	1	65	1	37	0	19	0	0		1	0			0	0	1
3	1101	2	67	1	29	0	26	0	0		1	0			0	1	1
3	1102	2	64	1	19	0	22	0	0		1	0			0	0	0
3	1103	2	62	1	16	0	19	0	0		1	0			0	0	0
3	1104	2	61	1	54	1	45	1	1		1	1	1b		0	0	0
3	1107	2	65	1	59	1	71	1	1		1	1	1b,3		0	1	0
3	1108	2	63	1	28	0	30	0	1		1	1	1b,3		0	2	0
3	1111	2	54	1	20	0	23	0	0		1	0			1	0	1
3	1112	2	50	1	30	0	40	1	0		1	0			0	0	1
3	1116	2	60	1	38	0	33	0	0		1	0			0	0	0
3	1117	2	55	1	13	0	29	0	0		1	0			1	0	1
3	1119	2	52	1	76	1	59	1	1		1	1	1b,3		1	0	0
3	1121	2	60	1	35	0	48	1	1		1	1	1b,3		0	0	0
3	1122	2	50	1	22	0	28	0	0		1	0			0	0	0
3	1123	2	67	1	54	1	55	1	1		1	1	1b,3		1	0	0
3	1124	2	58	1	41	1	37	0	0		1	0			1	0	0
3	1126	2	59	1	16	0	22	0	0		1	0			0	1	1
3	1129	2	74	1	9	0	16	0	1		1	1	1b,3		0	0	1
3	1130	2	63	1	14	0	25	0	0		1	0			0	0	0
3	1131	2	64	1	10	0	21	0	0		1	0			0	0	1
3	1133	2	50	1	35	0	43	1	0		1	0			0	0	0
3	1135	2	63	1	33	0	41	1	1		1	1	1b		0	0	1
3	1137	2	63	1	24	0	28	0	0		1	0			0	0	0
3	1144	2	59	1	39	0	49	1	1		1	1	1b,3		0	0	0
3	1146	2	58	1	30	0	37	0	1		1	1	1b,3		0	0	0
3	1150	2	61	1	21	0	29	0	1		1	1	1b,3		0	0	1
3	1151	2	46	1	26	0	27	0	1		1	1	1b		0	1	0
3	1155	2	44	1	200	1	108	1	0		1	0				1	0
3	1156	2	62	1	18	0	24	0	1		1	1	1b,3		0	0	1
3	1157	2	64	1	118	1	178	1	1		1	1	1b		0	1	0
3	1158	2	52	1	30	0	40	1	1		1	1	1b,2,3		0	0	1
3	1161	1	58	1	76	1	65	1	1		1	1	1b,3		0	0	0
3	1162	2	70	1	19	0	29	0	1		1	1	1b,3		1	0	0
3	1166	2	51	1	35	0	47	1	0		1	0			0	1	0
3	1167	2	61	1	37	0	35	0	1		1	1	1b		1	0	0
3	1168	1	63	1	18	0	27	0	0		1	0			0	0	0
3	1169	2	56	1	30	0	31	0	1		1	1	1b		0	0	0
3	1170	2	52	1	30	0	33	0	0		1	0			0	0	0
3	1171	1	52	1	26	0	50	1	1		1	1	1b,3		0	0	0
3	1172	1	52	1	33	0	50	1	0		1	0			1	0	0
3	1174	2	50	1	61	1	44	1	1		1	1	1b,3		0	0	1
3	1177	2	66	1	12	0	10	0	0		1	0			0	0	0
3	1178	2	63	1	189	1	75	1	1		1	1	1b,3		0	1	0
3	1180	2	51	1	33	0	43	1	0		1	0			0	0	0
3	1181	2	64	1	101	1	93	1	1		1	1	1b		0	0	0
3	1184	2	82	1	45	1	42	1	1		1	1	1b,3		1	0	0
3	1185	2	58	1	11	0	22	0	0		1	0			0	1	0
3	1187	2	48	1	16	0	18	0	1		1	1	1b,3		0	0	0
3	1188	2	63	1	62	1	53	1	1		1	1	1b		0	0	0
3	1190	1	67	1	56	1	79	1	0		1	0			0	0	0
3	1192	2	44	1	50	1	46	1	1		1	1	1b,2,3		0	1	0
3	1193	2	69	1	12	0	17	0	1		1	1	1b		0	0	0
3	1195	1	67	1	99	1	72	1	0		1	0			0	0	0
3	1197	2	55	1	82	1	114	1	0		1	0			0	0	0
3	1198	2	48	1	25	0	48	1	0		1	0			0	0	1
3	1199	2	54	1	14	0	19	0	1		1	1	1b,3		0	0	0
3	1200	2	70	1	18	0	24	0	1		1	1	1b,3		0	0	1
3	1201	2	69	1	20	0	23	0	0		1	0			0	0	0
3	1202	2	49	1	11	0	23	0	0		1	0			0	0	0
3	1203	2	60	1	16	0	27	0	1		1	1	1b,3		0	0	0
3	1206	2	67	1	17	0	25	0	1		1	1	1b,3		0	0	0
3	1207	2	50	1	25	0	23	0	1		1	1	1b,3		0	0	1
3	1209	1	65	1	32	0	43	1	1		1	1	1b		0	0	0
3	1210	2	63	1	91	1	105	1	1		1	1	1b,3		1	1	0
3	1211	1	65	1	95	1	113	1	1		1	1	1b,3		0	0	0
3	1212	1	79	1	80	1	86	1	1		1	1	1b,3		0	0	0
3	1213	1	63	1	25	0	36	0	1		1	1	1b		0	0	0
3	1214	1	63	1	23	0	31	0	1		1	1	1b,3		1	0	0
3	1216	2	71	1	133	1	90	1	1		1	1	1b,3		0	1	0
3	1217	2	67	1	29	0	33	0	0		1	0			0	0	1
3	1218	2	62	1	44	1	58	1	1		1	1	1b,3		1	1	0
3	1219	2	68	1	38	0	43	1	1		1	1	1b,3		1	0	0
3	1221	2	58	1	42	1	34	0	1		1	1	1b,3		1	0	1
3	1222	2	66	1	96	1	110	1	1		1	1	1b,2,3		0	0	0
3	1227	2	50	1	34	0	33	0	1		1	1	1b,3		1	1	0
3	1228	2	48	1	57	1	50	1	1		1	1	1b,3		0	1	0
3	1229	2	64	1	57	1	68	1	1		1	1	1b,3		0	0	0
3	1230	2	68	1	23	0	32	0	0		1	0			0	0	0
3	1232	2	51	1	14	0	21	0	0		1	0			1	0	0
3	1233	2	59	1	31	0	31	0	0		1	0			0	1	0
3	1235	1	48	1	78	1	58	1	0		1	0			0	1	0
3	1236	2	63	1	78	1	55	1	1		1	1	1b,3		0	1	0
3	1237	2	59	1	18	0	23	0	1		1	1	1b		1	0	0
3	1238	2	58	1	57	1	73	1	0		1	0			0	0	0
3	1239	2	55	1	56	1	60	1	1		1	1	1b,3		1	1	0
3	1240	2	61	1	9	0	22	0	1		1	1	1b,3		0	0	0
3	1241	2	56	1	33	0	23	0	0		1	0			0	0	0
3	1242	2	60	1	99	1	78	1	0		1	0			0	0	1
3	1243	1	61	1	20	0	22	0	1		1	1	1b,3		0	0	1
3	1244	2	58	1	16	0	23	0	0		1	0			0	0	1
3	1245	2	59	1	58	1	45	1	1		1	1	1b,3		0	0	1
3	1246	2	62	1	24	0	33	0	1		1	1	1b		1	0	1
3	1249	2	59	1	15	0	20	0	1		1	1	1b,3		0	0	0
3	1250	2	62	1	36	0	35	0	1		1	1	1b,3		1	0	0
3	1252	2	59	1	118	1	172	1	1		1	1	1b,3		1	2	1
3	1254	2	49	1	26	0	39	0	1		1	1	1b		0	0	1
3	1259	2	48	1	78	1	102	1	1		1	1	1b,3		0	0	0
3	1260	2	61	1	27	0	41	1	0		1	0			0	0	0
3	1261	2	64	1	271	1	282	1	0		1	0			0	0	0
3	1262	2	62	1	26	0	33	0	1		1	1	1b,3		0	0	0
3	1263	1	69	1	35	0	37	0	1		1	1	1b,3		0	0	0
3	1264	2	50	1	67	1	74	1	1		1	1	1b		0	0	0
3	1265	2	56	1	24	0	49	1	1		1	1	1b,3		0	1	1
3	1266	1	71	1	15	0	20	0	0		1	0			0	1	1
3	1269	2	51	1	38	0	47	1	1		1	1	1b		1	1	0
3	1272	1	67	1	51	1	55	1	1		1	1	1b,2,3		0	0	0
3	1275	2	41	1	19	0	40	1	1		1	1	1b,2		0	0	0
3	1276	2	55	1	54	1	36	0	0		1	0			0	1	1
3	1278	2	51	1	21	0	35	0	1		1	1	1b		0	0	0
3	1279	2	62	1	97	1	74	1	1		1	1	1b		0	0	0
3	1280	2	61	1	12	0	21	0	1		1	1	1b,3		0	0	0
3	1283	2	47	1	23	0	18	0	0		1	0			0	0	0
3	1285	2	68	1	18	0	24	0	0		1	0			0	0	1
3	1286	2	50	1	22	0	32	0	1		1	1	1b		1	2	0
3	1287	2	59	1	34	0	36	0	1		1	1	1b,3		1	0	0
3	1288	2	51	1	32	0	31	0	0		1	0			1	0	0
3	1289	2	53	1	39	0	39	0	1		1	1	1b,3		0	0	0
3	1290	2	55	1	45	1	43	1	0		1	0			0	0	0
3	1292	2	52	1	15	0	25	0	1		1	1	1b,3		1	0	0
3	1293	2	73	1	17	0	25	0	1		1	1	1b,3		0	0	0
3	1295	2	53	1	24	0	29	0	0		1	0			1	0	1
3	1296	2	43	1	32	0	16	0	0		1	0			0	0	1
3	1297	2	72	1	40	1	42	1	0		1	0			0	0	0
3	1300	2	56	1	16	0	28	0	0		1	0			0	1	0
3	1301	1	61	1	34	0	28	0	1		1	1	1b		0	0	1
3	1303	2	64	1	36	0	42	1	1		1	1	1b,2,3		0	1	0
3	1305	2	65	1	39	0	43	1	0		1	0			0	0	0
3	1306	2	55	1	30	0	34	0	1		1	1	1b,3		0	0	0
3	1310	2	59	1	40	1	51	1	1		1	1	1b		1	0	1
3	1311	2	60	1	59	1	60	1	1		1	1	1b		0	0	0
3	1312	2	65	1	12	0	11	0	0		1	0			0	0	0
3	1313	2	68	1	29	0	30	0	1		1	1	1b		0	0	1
3	1314	2	49	1	22	0	29	0	1		1	1	1b,3		0	0	0
3	1315	2	65	1	18	0	30	0	1		1	1	1b		0	0	0
3	1316	2	50	1	36	0	58	1	1		1	1	1b,3		0	0	0
3	1317	2	47	1	24	0	29	0	1		1	1	1a		0	0	0
3	1318	1	48	1	30	0	41	1	1		1	1	1b,3		0	0	0
3	1319	2	59	1	28	0	22	0	1		1	1	1a		0	0	0
3	1322	2	56	1	18	0	28	0	1		1	1	1b,3		0	0	0
3	1324	2	58	1	36	0	38	0	0		1	0			1	0	0
3	1328	2	50	1	80	1	72	1	1		1	1	1b,3		0	1	0
3	1329	1	51	1	35	0	46	1	0		1	0			0	0	0
3	1330	2	62	1	40	1	37	0	0		1	0			0	0	0
3	1331	2	54	1	39	0	43	1	0		1	0			0	1	0
3	1332	2	58	1	67	1	103	1	0		1	0			0	0	0
3	1333	2	56	1	51	1	45	1	1		1	1	1b		0	0	0
3	1334	2	47	1	14	0	14	0	1		1	1	1b		1	0	0
3	1335	2	53	1	21	0	24	0	0		1	0			0	0	0
3	1336	2	56	1	127	1	145	1	0		1	0			1	0	0
3	1337	2	62	1	32	0	33	0	1		1	1	1b,3		0	1	0
3	1338	2	66	1	56	1	64	1	1		1	1	1b,3		1	0	1
3	1339	2	66	1	109	1	71	1	1		1	1	1b,3		1	0	0
3	1340	2	63	1	22	0	27	0	0		1	0			0	0	1
3	1343	1	55	1	37	0	39	0	1		1	1	1b,3		1	0	1
3	1344	2	63	1	40	1	54	1	0		1	0			0	1	0
3	1345	2	57	1	42	1	34	0	0		1	0			0		0
3	1346	2	70	1	52	1	50	1	1		1	1	1a		0	0	1
3	1348	2	64	1	15	0	26	0	1		1	1	1a		0	0	1
3	1349	2	57	1	30	0	38	0	1		1	1	1b,3		0	0	0
3	1357	2	56	1	24	0	27	0	1		1	1	1b,3		0	1	0
3	1358	2	61	1	21	0	27	0	1		1	1	1b		0	0	0
3	1359	2	63	1	33	0	25	0	1		1	1	1b,3		0	0	0
3	1360	2	68	1	41	1	59	1	0		1	0			0	1	0
3	1361	2	57	1	14	0	18	0	1		1	1	1b,3		1	0	0
3	1363	2	52	1	39	0	28	0	1		1	1	1a,3		0	0
3	1364	1	58	1	201	1	155	1	1		1	1	1b,3		0	0	0
3	1365	2	57	1	39	0	35	0	1		1	1	1b		1	0	1
3	1367	2	61	1	40	1	52	1	1		1	1	1b		0	0	0
3	1369	2	61	1	152	1	138	1	1		1	1	1b,3		0	0	0
3	1370	2	54	1	22	0	25	0	1		1	1	1b,3		1	1	1
3	1374	2	73	1	20	0	18	0	1		1	1	1b,3		0	0	0
3	1375	2	59	1	14	0	22	0	1		1	1	1b,3		1	0	1
3	1376	2	51	1	36	0	121	1	1		1	1	1b,3		0	1	0
3	1377	2	65	1	43	1	61	1	1		1	1	1b,3		0	0	0
3	1379	2	67	1	29	0	27	0	1		1	1	1b,3		0	1	0
3	1380	2	65	1	47	1	41	1	0		1	0			0	0	0
3	1381	2	70	1	26	0	23	0	1		1	1	1b,3		0	0	0
3	1383	2	59	1	53	1	54	1	1		1	1	1b,3		0	0	0
3	1384	2	60	1	24	0	34	0	1		1	1	1b,3		1	0	1
3	1385	1	56	1	158	1	161	1	1		1	1	1b,3		0	0	0
3	1386	2	62	1	40	1	60	1	1		1	1	1b,3		0	0	0
3	1387	2	64	1	35	0	50	1	1		1	1	1b,3		0	0	0
3	1388	2	64	1	35	0	47	1	1		1	1	1b,3		0	0	0
3	1390	2	60	1	45	1	37	0	0		1	0			0	0	0
3	1391	2	60	1	43	1	35	0	1		1	1	1b,3		0	1	0
3	1392	1	72	1	56	1	41	1	1		1	1	1b,3		0	0	0
3	1394	2	57	1	14	0	49	1	1		1	1	1b		0	0	0
3	1395	1	77	1	18	0	32	0	0		1	0			1	1	0
3	1396	1	61	1	172	1	132	1	1		1	1	1b,3		0	1	0
3	1398	2	47	1	47	1	49	1	0		1	0			0	0	0
3	1401	1	56	1	70	1	42	1	1		1	1	1b,3		0	0	0
3	1402	2	53	1	47	1	51	1	1		1	1	1b		0	1	0
3	1404	2	58	1	36	0	36	0	1		1	1	1b		0	1	0
3	1405	2	54	1	106	1	84	1	0		1	0			0	0	0
3	1409	2	56	1	8	0	14	0	0		1	0			0	0	0
3	1410	2	55	1	28	0	35	0	1		1	1	1b		0	0	0
3	1413	2	62	1	15	0	23	0	0	0	1	0			0	2	0
3	1414	2	61	1	116	1	68	1	1	0	1	1			2	1	0
3	1415	2	60	1	43	1	38	0	1		1	1			1	0	1
3	1418	2	68	1	15	0	22	0	0	9	1	0			1	1	0
3	1424	2	50	1	28	0	32	0	0	0	1	0			1	0	1
3	1426	2	50	1	35	0	30	0	1	9	1	1			0	0	0
3	1428	1	61	1	50	1	39	0	1	9	1	1			0	1	0
3	1429	2	54	1	12	0	21	0	1	0	1	1			0	0	0
3	1432	2	47	1	24	0	27	0	0	9	1	0			0	0	0
3	1433	2	72	1	13	0	22	0	0	9	1	0			1	0	1
3	1435	2	49	1	18	0	14	0	0	9	1	0			1	0	0
3	1436	2	61	1	13	0	14	0	0	9	1	0			0	0	0
3	1437	1	69	1	20	0	30	0	0	9	1	0			0	0	0
3	1438	2	66	1	24	0	26	0	0	9	1	0			0	0	0
3	1439	2	68	1	94	1	80	1	1	9	1	1			0	1	0
3	1440	2	57	1	61	1	45	1	1	9	1	1			0	0	0
3	1441	2	56	1	521	1	269	1	1	9	1	1			0	0	0
3	1442	2	71	1	15	0	20	0	1	9	1	1			0	1	0
3	1443	2	65	1	49	1	38	0	1		1	1			0	0	0
3	1444	2	74	1	100	1	70	1	1	9	1	1			0	1	0
3	1447	2	65	1	33	0	39	0	1	0	1	1				0	1
3	1450	2	62	1	47	1	41	1	1	0	1	1			0	0	1
3	1451	2	69	1	18	0	21	0	0	9	1	0			0	0
3	1453	2	47	1	31	0	23	0	1	0	1	1			0	1	2
3	1455	2	69	1	17	0	22	0	0	9	1	0			0	0
3	1456	2	69	1	68	1	53	1	1	9	1	1			0	0
3	1467	2	53	1	12	0	20	0	0	9	1	0			1	1	0
3	1469	2	65	1	19	0	18	0	0	0	1	0			0	0	0
3	1471	2	53	1	12	0	13	0	0	0	1	0			0	0	0
3	1472	2	58	1	9	0	15	0	0	9	1	0			0	0	0
3	1475	2	65	1	19	0	25	0	1	9	1	1			0	0	0
3	1481	2	60	1	11	0	17	0	0	0	1	0				0	0
3	1482	2	62	1	10	0	17	0	0	9	1	0			1	0	1
3	1483	2	60	1	121	1	98	1	1	9	1	1			0	1	1
3	1484	2	64	1	26	0	24	0	0	9	1	0			1	0	1
3	1488	2	57	1	19	0	19	0	0	9	1	0			0	0	0
3	1489	2	62	1	69	1	44	1	1	9	1	1			0	0	0
3	1492	2	61	1	25	0	23	0	1	0	1	1			0	0	0
3	1496	2	53	1	13	0	19	0	0	9	1	0			0	1	0
3	1502	1	67	1	10	0	13	0	0	0	1	0			0	0	0
3	1503	2	60	1	16	0	18	0	0	0	1	0			0	0	0
3	1504	2	62	1	48	1	37	0	1	0	1	1			0	0	0
3	1507	1	50	1	31	0	31	0	1	0	1	1			0	0	0
3	1509	2	64	1	18	0	22	0	0	0	1	0				1	1
3	1511	2	57	1	35	0	34	0	1	0	1	1			0	1	0
3	1512	1	62	1	64	1	72	1	1	0	1	1			0	0	0
3	1513	1	62	1	84	1	69	1	1	9	1	1			0	0	0
3	1514	2	62	1	67	1	53	1	1	9	1	1			2	2	2
3	1515	2	66	1	18	0	29	0	0	0	1	0			0	0	0
3	1517	2	58	1	18	0	27	0	0	0	1	0			0	0	0
3	1519	1	52	1	38	0	29	0	0	0	1	0			0	1	0
3	1521	2	55	1	36	0	8	0	1	9	1	1			1	1	1
3	1523	2	50	1	22	0	26	0	1	9	1	1			0	0	0
3	1526	2	50	1	33	0	24	0	1	9	1	1			0	0	0
3	1527	2	59	1	127	1	103	1	1	9	1	1			0	0	0
3	1529	2	60	1	34	0	24	0	1	9	1	1			0	0	0
3	1531	2	54	1	30	0	32	0	0	0	1	0			0	1
3	1534	2	58	1	15	0	18	0	0	9	1	0			1	0	0
3	1536	2	55	1	41	1	32	0	1	9	1	1			0	0	0
3	1542	2	53	1	64	1	46	1	1	9	1	1			0	0	0
3	1545	2	53	1	71	1	52	1	0	9	1	0			0	0	0
3	1546	2	50	1	40	1	32	0	0	9	1	0			0	0	0
3	1547	2	64	1	39	0	26	0	1	9	1	1			1	0	1
3	1549	2	61	1	14	0	18	0	0	0	1	0			0	0	0
3	1550	1	67	1	48	1	40	1	1	9	1	1			0	0	0
3	1552	2	63	1	36	0	33	0	1	0	1	1			1	0	1
3	1553	2	54	1	28	0	29	0	1	0	1	1			0	0	0
3	1554	2	67	1	16	0	28	0	0	0	1	0			0	0	0
3	1556	1	66	1	103	1	97	1	1	9	1	1			0	1	0
3	1558	2	70	1	32	0	35	0	1	9	1	1			0	0	0
3	1560	2	59	1	13	0	17	0	0	9	1	0			1	0	1
3	1561	2	48	1	15	0	16	0	0	9	1	0			0	1	0
3	1562	1	57	1	73	1	56	1	1	9	1	1			0	0	0
3	1563	2	57	1	37	0	40	1	1	9	1	1			0	0	0
3	1564	2	51	1	14	0	20	0	0	9	1	0			0	0	0
3	1566	2	54	1	16	0	18	0	0	9	1	0			0	0	0
3	1567	2	65	1	42	1	34	0	0	9	1	0			0	0	0
3	1571	2	77	1	36	0	37	0	0	0	1	0			1	0	1
3	1575	2	66	1	14	0	17	0	0	9	1	0			0	0	0
3	1577	2	49	1	12	0	16	0	0	0	1	0			1	0	1
3	1582	2	59	1	15	0	21	0	1	9	1	1			0	1	0
3	1583	2	64	1	89	1	161	1	1	9	1	1			0	0	1
3	1584	2	70	1	40	1	31	0	1	9	1	1			0	0	0
3	1587	2	54	1	28	0	25	0	1	9	1	1			0	0	0
3	1593	2	64	1	70	1	63	1	1	9	1	1			0	0	0
3	1596	2	85	1	110	1	97	1	1	9	1	1			2	0	2
3	1598	2	66	1	97	1	64	1	1	9	1	1			1	0	1
3	1608	2	50	1	16	0	16	0	0	9	1	0			0	0	0
3	1610	2	49	1	35	0	36	0	1	9	1	1			0	0	0
3	1611	2	61	1	14	0	17	0	0	9	1	0			0	1	0
3	1616	2	52	1	146	1	94	1	1	9	1	1			0	0	0
3	1618	2	66	1	20	0	21	0	0	9	1	0			0	2	0
3	1620	1	54	1	20	0	18	0	0	9	1	0				2	1
3	1625	2	52	1	41	1	30	0	1	9	1	1			0	0	0
3	1627	2	53	1	14	0	15	0	0	0	1	0			0	1	0
3	1630	2	58	1	9	0	18	0	0	9	1	0			1	0	0
3	1641	2	58	1	57	1	53	1	1	9	1	1			1	0	0
3	1643	2	56	1	22	0	25	0	1	9	1	1			0	0	0
3	1644	2	70	1	14	0	23	0	0	9	1	0			0	0	0
3	1645	2	48	1	11	0	17	0	0	9	1	0			0	0	0
3	1648	2	68	1	21	0	26	0	1	9	1	1			0	0	0
3	1651	2	53	1	53	1	43	1	1	9	1	1			1	0	1
3	1676	2	68	1	20	0	24	0	0	9	1	0			0	0	0
3	1682	1	77	1	29	0	62	1	1	9	1	1			0	0	0
3	2115	2	59	1	42	1	28	0	1	0	1	1			0	1	0
3	2117	2	50	1	24	0	25	0	0	0	1	0			0	0	0
3	2122	2	70	1	21	0	36	0	1	0	1	1			1	1	1
3	2123	2	66	1	10	0	18	0	0	0	1	0			1	0	1
3	2135	2	71	1	21	0	36	0	1	0	1	1			0	0	0
3	2140	2	67	1	61	1	55	1	1	9	1	1			0	0	0
3	2143	2	50	1	168	1	122	1	1	0	1	1			0	1	0
3	2147	2	67	1	20	0	26	0	0	9	1	0			0	1	0
3	2151	2	48	1	23	0	22	0	1	9	1	1			0	0	0
3	2157	2	66	1	68	1	88	1	1	9	1	1			0	1	0
3	2158	1	63	1	49	1	51	1	1	9	1	1			0	0	0
3	2160	2	62	1	47	1	48	1	1	9	1	1			0	0	0
3	2162	1	64	1	63	1	56	1	1	9	1	1			0		0
3	2164	2	62	1	29	0	27	0	0	9	1	0			0	1	0
3	2166	2	48	1	19	0	22	0	0	9	1	0			0	0	0
3	2169	2	59	1	14	0	24	0	0	9	1	0			0	0
3	2175	1	65	1	34	0	28	0	0	9	1	0			0	0	0
3	2176	2	64	1	16	0	21	0	0	9	1	0			1	1	1
3	2179	2	52	1	52	1	43	1	1	9	1	1			0	0
3	2180	2	55	1	22	0	22	0	0	0	1	0			0	0	0
3	2181	1	67	1	117	1	91	1	1	9	1	1			0	0	0
3	2182	2	66	1	40	1	33	0	1	9	1	1			0	1	0
3	2184	1	59	1	70	1	40	1	1	0	1	1			1	0	1
3	2185	2	71	1	26	0	21	0	0	9	1	0			0	0	0
3	2186	2	47	1	15	0	19	0	0	9	1	0			0	1	0
3	2187	2	70	1	21	0	21	0	0	9	1	0			0	1	0
3	2188	2	51	1	23	0	32	0	1	9	1	1			0	0	0
3	2190	2	66	1	24	0	35	0	1	0	1	1			0	0	0
3	2203	2	60	1	13	0	13	0	0	9	1	0			1	1
3	2205	2	65	1	58	1	44	1	1	9	1	1			0	0	0
3	2219	2	64	1	86	1	55	1	1	9	1	1			1	0	1
3	2227	2	61	1	14	0	20	0	0	9	1	0			0	0	0
3	2228	1	63	1	175	1	135	1	1	9	1	1			0	1	0
3	2229	2	50	1	63	1	48	1	1	0	1	1			1	0	1
3	2235	2	54	1	87	1	73	1	1	0	1	1			0	1	0
3	2236	2	54	1	33	0	24	0	0	9	1	0			0	0	0
3	2238	2	60	1	18	0	19	0	0	0	1	0			0	1	0
3	2240	2	50	1	10	0	16	0	0	0	1	0			0	0	0
3	2241	1	62	1	132	1	68	1	1	9	1	1			0	0	0
3	2243	2	56	1	16	0	24	0	0	9	1	0				0
3	2249	2	50	1	16	0	18	0	0	0	1	0			0	0	0
3	2258	2	62	1	27	0	26	0	1	0	1	1			0	0	0
3	2259	2	53	1	28	0	29	0	1	9	1	1			0	0	0
3	2260	2	62	1	228	1	275	1	1	9	1	1			0	0	0
3	2263	2	62	1	29	0	44	1	1	9	1	1			0	0	0
3	2264	2	58	1	114	1	115	1	1	0	1	1			0	0	0
3	2265	2	67	1	34	0	40	1	1	9	1	1			0	0	0
3	2279	2	61	1	52	1	64	1	1	0	1	1			0	0	0
3	2281	2	53	1	15	0	21	0	0	9	1	0			0	0	1
3	2282	1	50	1	54	1	38	0	1	9	1	1			0	0	0
3	2283	2	65	1	201	1	158	1	1	9	1	1			0	0	0
3	2293	2	52	1	26	0	29	0	1	0	1	1			0	0	0
3	2294	2	55	1	56	1	44	1	1	0	1	1			0	0	0
3	2304	2	63	1	25	0	28	0	1	0	1	1			0	0	0
3	2314	1	51	1	18	0	23	0	0	9	1	0			0	0	0
3	2319	2	52	1	25	0	38	0	1	0	1	1			0	0	0
3	2321	2	56	1	55	1	44	1	1	0	1	1			0	1	0
3	2322	2	55	1	13	0	24	0	0	9	1	0			1	0	1
3	2328	2	57	1	9	0	16	0	0	0	1	0			0	0	0
3	2330	1	61	1	92	1	88	1	1	9	1	1			0	0	0
3	2332	2	52	1	32	0	40	1	1	9	1	1			0	0
3	2334	2	48	1	35	0	27	0	0	0	1	0			0	0	0
3	2344	1	62	1	142	1	87	1	1	0	1	1			0	0	0
3	2349	2	51	1	33	0	29	0	0	9	1	0			1	0	0
3	2350	2	50	1	18	0	28	0	1	9	1	1			0	0	0
3	2353	2	49	1	51	1	47	1	1	9	1	1			0
3	2357	2	64	1	16	0	21	0	0	9	1	0			0	0	0
3	2360	2	48	1	54	1	48	1	1	9	1	1			1	0	1
3	2363	2	59	1	13	0	21	0	0	9	1	0			0	0	0
3	2364	2	56	1	12	0	22	0	0	9	1	0			0	0	0
3	2366	2	62	1	58	1	42	1	1		1	1			0	0	0
3	2379	2	71	1	11	0	19	0	0	9	1	0			0	0	0
3	2381	2	60	1	52	1	76	1	0	9	1	0			1	1	0
3	2383	2	52	1	48	1	47	1	1	9	1	1			0	1	0
3	2384	2	54	1	12	0	36	0	1	9	1	1			0	0	1
3	2387	1	54	1	29	0	43	1	0	9	1	0			0	0	0
3	2388	2	52	1	22	0	52	1	1	9	1	1				0	1
3	2392	2	63	1	17	0	21	0	1	0	1	1			0	0	0
3	2396	2	50	1	69	1	56	1	1	0	1	1			1	1	1
3	2398	2	53	1	58	1	55	1	1	0	1	1			0	0	0
3	2401	2	61	1	9	0	15	0	0	9	1	0			0	1	0
3	2403	2	45	1	37	0	36	0	1	9	1	1			0	0	0
3	2414	1	69	1	22	0	25	0	1	0	1	1			0	1	0
3	2418	2	58	1	11	0	19	0	0	0	1	0			0	0	0
3	2423	2	58	1	20	0	29	0	1	0	1	1			0	1	0
3	2425	2	48	1	23	0	27	0	0	9	1	0			0	1	0
3	2427	2	71	1	29	0	33	0	1	9	1	1			0	0	0
3	2430	2	71	1	206	1	138	1	1	9	1	1			0	0	0
3	2433	1	74	1	20	0	26	0	1	9	1	1			0	1	0
3	2437	1	53	1	127	1	112	1	1	9	1	1			0	0	0
3	2547	2	64	1	33	0	27	0	0	9	1	0			0	0	0
3	2550	2	57	1	19	0	24	0	1	9	1	1			0	0	0
3	2552	2	55	1	66	1	56	1	1	9	1	1			0	0	0
3	2569	2	62	1	16	0	32	0	0	0	1	0			0	0	0
3	2575	2	56	1	40	1	41	1	1	0	1	1			1	0	1
3	2586	1	67	1	76	1	78	1	1	9	1	1			0	1	0
3	2598	2	66	1	26	0	29	0	1	0	1	1			0	0	0
3	2613	2	53	1	42	1	32	0	1	0	1	1			0	0	0
3	2616	2	55	1	19	0	23	0	0	0	1	0			0	0	0
3	2618	2	60	1	56	1	58	1	1	0	1	1			1	0	1
3	2627	2	62	1	20	0	24	0	0	0	1	0			0	1	0
3	2631	2	68	1	20	0	25	0	0	9	1	0			1	1	0
3	2639	1	65	1	26	0	64	1	1	0	1	1			0	1	0
3	2647	2	59	1	39	0	43	1	1	9	1	1			0	1	0
3	2650	2	59	1	27	0	31	0	1	9	1	1			0	1	0
3	2652	2	63	1	32	0	22	0	1	9	1	1			0	1	0
3	2653	2	70	1	38	0	39	0	1	9	1	1			0	1	0
3	2675	2	54	1	11	0	18	0	0	9	1	0			1		1
3	2681	2	52	1	27	0	23	0	1	1	1	1			0	1	0
3	2684	2	52.4	1	24	0	27	0	1	9	1	1			0	1	0
3	2696	1	62	1	47	1	47	1	1	9	1	1			0	1	0
3	2708	2	68	1	15	0	31	0	1	9	1	1			0	1	0
3	2715	2	59	1	14	0	21	0	0	0	1	0			0	1	0
3	2716	2	52	1	12	0	17	0	0	9	1	0			0	1	0
3	2719	2	55	1	14	0	21	0	0	0	1	0			0	1	0
3	2721	2	60	1	40	1	59	1	1	0	1	1			2	1	2
3	2722	2	59	1	10	0	20	0	0	0	1	0			0	2	0
3	2724	2	52	1	28	0	33	0	1	0	1	1			0		0
3	2726	2	51	1	24	0	30	0	0	0	1	0			1	1	1
3	2728	2	65	1	13	0	20	0	0	9	1	0			0	2	1
3	2734	2	59	1	44	1	25	0	0	9	1	0			0	1	0
3	2768	2	52	1	30	0	41	1	1	0	1	1			0	1	0
3	2777	2	44	1	10	0	14	0	0	0	1	0			0	1	0
3	2779	2	65	1	31	0	35	0	1	0	1	1			0	1	0
3	2786	2	58	1	26	0	20	0	0	0	1	0			0	1	0
3	2791	2	54	1	12	0	21	0	0	1	1	0			0	1	0
3	2801	1	71	1	180	1	126	1	1	0	1	1			0		0
3	2813	2	52	1	17	0	23	0	0	0	1	0			0	1	0
3	2821	1	59	1	44	1	66	1	1	9	1	1			0	1	0
3	2826	2	61	1	21	0	27	0	1	0	1	1			0	1	0
3	2839	2	65	1	8	0	18	0	0	0	1	0			0	1	0
3	2841	2	63	1	48	1	37	0	1	9	1	1			0	1	0
3	2856	2	60	1	34	0	37	0	1	9	1	1			2	1	2
3	2857	2	67	1	130	1	222	1	1	9	1	1			0	1	0
3	2863	2	52.4	1	17	0	24	0	1		1	1			0	2	0
3	2864	2	73	1	16	0	48	1	1	0	1	1			0	1	0
3	2874	2	65	1	21	0	30	0	1	9	1	1			0	1	0
3	2882	2	42	1	13	0	15	0	0	1	1	0			0	2	0
3	2887	2	58	1	26	0	31	0	1	1	1	1			0	1	0
3	2888	2	54	1	29	0	29	0	1	9	1	1			2	1	2
3	2894	2	54	1	12	0	19	0	0	9	1	0			0	2	0
3	2896	2	66	1	18	0	21	0	1	9	1	1			0	1	0
3	2897	2	64	1	24	0	29	0	1	9	1	1			0	1	0
3	2903	2	53	1	29	0	28	0	1	9	1	1			0	1	0
3	2906	1	69	1	8	0	18	0	0	0	1	0			0	2	0
3	2911	2	53	1	34	0	34	0	0	0	1	0			0	2	0
3	2913	2	66	1	156	1	131	1	1	0	1	1			1	2	1
3	2916	1	53	1	131	1	64	1	1	0	1	1			0	1	0
3	2927	2	63	1	35	0	34	0	1	0	1	1			0	1	0
3	2941	1	58	1	40	1	34	0	1	9	1	1			0	1	0
3	2956	2	56	1	13	0	19	0	0	9	1	0			0	2	1
3	2961	2	63	1	27	0	68	1	1	0	1	1			0	1	0
3	2964	1	63	1	16	0	19	0	0	9	1	0			0	2	0
3	2965	2	65	1	37	0	51	1	1	9	1	1			0	1	0
3	2972	2	53	1	14	0	19	0	0	0	1	0			1	1	1
3	2977	2	50	1	52	1	40	1	1	0	1	1			1	1	0
3	2979	2	55	1	37	0	39	0	1	0	1	1			0	2	0
3	2987	2	55	1	60	1	109	1	1	9	1	1			2	2	1
3	2988	1	62	1	38	0	34	0	0	0	1	0			0	1	0
3	2989	2	52	1	16	0	24	0	0	0	1	0			2	1	1
3	2990	2	55	1	38	0	33	0	1	0	1	1				2
3	1701	2	53	1	31	0	24	0	1		1	1			0	0	0
3	1703	2	61	1	13	0	25	0	0	9	1	0			0	0	0
3	1716	2	52	1	28	0	28	0	1	9	1	1			0	1	0
3	1717	2	64	1	12	0	19	0	0	9	1	0			0	0	0
3	1720	2	50	1	12	0	15	0	0	9	1	0			0	1	0
3	1733	2	60	1	8	0	17	0	0		1	0			0	1	0
3	1744	2	65	1	28	0	28	0	1	0	1	1				1
3	1754	2	63	1	65	1	48	1	1	9	1	1			2	0
3	1756	2	60	1	30	0	28	0	0	0	1	0			0	0	0
3	1763	2	43	1	43	1	31	0	1	0	1	1			0	0	0
3	1776	2	52.4	1	134	1	125	1	1		1	1			0	0	0
3	1784	2	63	1	82	1	112	1	1	9	1	1			0		0
3	1792	1	56	1	37	0	56	1	1	0	1	1			0	1	0
3	1799	2	49	1	11	0	17	0	0	0	1	0			0	1	0
3	1803	2	71	1	15	0	16	0	0	9	1	0			0		0
3	1806	2	60	1	24	0	30	0	0	9	1	0			1	0	0
3	1811	2	52	1	61	1	49	1	1	9	1	1			0	0	0
3	1819	2	63	1	25	0	24	0	1	9	1	1			0	1	0
3	1820	2	64	1	37	0	36	0	1	0	1	1			0		0
3	1821	2	67	1	25	0	31	0	1	9	1	1			0	1	0
3	1827	2	51	1	24	0	31	0	1	9	1	1			0	0	0
3	1855	2	56	1	51	1	42	1	1	0	1	1			1	0	1
3	1856	1	63	1	79	1	80	1	1	9	1	1			0	0	0
3	1858	2	65	1	36	0	34	0	1	9	1	1			0	0	0
3	1861	1	67	1	99	1	111	1	1	9	1	1			0	0	0
3	1865	2	65	1	61	1	60	1	1	9	1	1			0	1	0
3	1867	2	44	1	17	0	19	0	0	9	1	0			0	1	0
3	1872	2	67	1	13	0	18	0	0	9	1	0			0	0	0
3	1878	2	67	1	28	0	38	0	1	9	1	1			1	0	1
3	1885	2	50	1	112	1	71	1	1	9	1	1			0	0	0
3	1903	1	60	1	36	0	35	0	1	9	1	1			0	1	0
3	1906	2	55	1	43	1	40	1	1	0	1	1			0	0	1
3	1908	2	52	1	25	0	25	0	0	0	1	0			0	0	0
3	1913	2	55	1	11	0	18	0	0	9	1	0			0	0	0
3	1925	2	60	1	24	0	21	0	0	9	1	0			0	0	0
3	1926	2	69	1	67	1	64	1	1	1	1	1			0	0	0
3	1927	1	67	1	19	0	30	0	1	9	1	1			0	0	0
3	1929	2	45	1	45	1	34	0	0	9	1	0			1	0	0
3	1934	2	72	1	24	0	34	0	1	9	1	1			1	1	1
3	1936	2	71	1	52	1	70	1	1	0	1	1			0	1	0
3	1940	2	61	1	48	1	47	1	1	9	1	1			0	2	0
3	1942	2	62	1	34	0	41	1	1	0	1	1			0	0	0
3	1957	2	51	1	17	0	22	0	0	9	1	0			0	1	0
3	1959	2	59	1	28	0	29	0	1	9	1	1			1	0	0
3	1965	2	66	1	51	1	74	1	1	0	1	1			1	1	0
3	1968	2	70	1	103	1	74	1	1	9	1	1			0	0	0
3	1969	2	67	1	15	0	17	0	0	0	1	0			1	0	1
3	1973	1	80	1	26	0	28	0	1	9	1	1			0	1	0
3	1985	1	65	1	70	1	48	1	1	9	1	1			0	0	0
3	1990	2	62	1	11	0	18	0	1	0	1	1			0	1	0
3	1994	2	57	1	14	0	20	0	0	0	1	0			1	0	0
3	1996	2	60	1	35	0	36	0	1	0	1	1			0	1	0
3	1998	2	64	1	87	1	81	1	1	0	1	1			0	1	0
3	2002	2	70	1	45	1	42	1	0	9	1	0			0	1	0
3	2009	2	58	1	45	1	41	1	1	0	1	1			1	0	0
3	2011	2	63	1	45	1	33	0	1	0	1	1			0	0	0
3	2028	2	65	1	8	0	18	0	0	0	1	0			0	0	0
3	2031	2	54	1	17	0	28	0	0	9	1	0			0	1	0
3	2042	2	54	1	23	0	21	0	0	9	1	0			0	1	0
3	2044	2	65	1	162	1	119	1	1	9	1	1			0	0	0
3	2046	2	59	1	32	0	31	0	1	9	1	1			0	0	0
3	2049	2	64	1	41	1	46	1	1	9	1	1			0	1	0
3	2054	2	64	1	23	0	30	0	0	9	1	0			0	0	0
3	2062	2	65	1	23	0	34	0	1	9	1	1			0	1	0
3	2072	2	51	1	85	1	70	1	0	9	1	0			0	1	0
3	2073	1	53	1	9	0	19	0	0	9	1	0			0	0	0
3	2077	2	52	1	42	1	38	0	1	9	1	1			1	0	0
3	2085	2	51	1	61	1	48	1	1	0	1	1			0	0	0
3	2086	2	52	1	15	0	23	0	0	9	1	0			0	1	0
3	2088	2	61	1	64	1	57	1	1	9	1	1			0	0	0
3	2102	2	63	1	25	0	25	0	0	9	1	0			0	0	0
3	2451	2	59	1	63	1	66	1	1	0	1	1			0	0	0
3	2456	2	64	1	14	0	20	0	1	9	1	1			0	0	0
3	2467	2	51	1	21	0	20	0	0	0	1	0			0	0	0
3	2472	2	61	1	18	0	20	0	0	0	1	0			0	0	0
3	2479	2	52.4	1	21	0	27	0	1		1	1			1	0	0
3	2494	1	56	1	50	1	51	1	1	9	1	1			0	0	0
3	2501	2	74	1	113	1	99	1	1	9	1	1			0	0	0
3	2505	2	52.4	1	13	0	18	0	0	9	1	0			0	0	0
